# Supplementary material for: Discovery of isoflavone phytoalexins in wheat reveals an alternative route to isoflavonoid biosynthesis
Source: PubMed Central journal article supplement (PMC10620232; doi:10.1038/s41467-023-42464-3), 2023-11-01
Supplement: 41467_2023_42464_MOESM1_ESM.pdf [file 41467_2023_42464_MOESM1_ESM.pdf]

**Supplementary Information for:**

**Discovery of Isoflavone Phytoalexins in Wheat Reveals an Alternative  
Route to Isoflavonoid Biosynthesis**

Guy Polturak<sup>\*‡1,2</sup>, Rajesh Chandra Misra<sup>‡1</sup>, Amr El-Demerdash<sup>1,3</sup>, Charlotte Owen<sup>1</sup>, Andrew Steed<sup>4</sup>, Hannah P McDonald<sup>5</sup>, JiaoJiao Wang<sup>1,6</sup>, Gerhard Saalbach<sup>7</sup>, Carlo Martins<sup>7</sup>, Laetitia Chartrain<sup>4</sup>, Barrie Wilkinson<sup>5</sup>, Paul Nicholson<sup>4</sup>, Anne Osbourn<sup>\*1</sup>

<sup>1</sup>Biochemistry and Metabolism Department, John Innes Centre, Norwich NR4 7UH, United Kingdom

<sup>2</sup>Institute of Plant Sciences and Genetics in Agriculture, The Hebrew University of Jerusalem, Rehovot 7610001, Israel

<sup>3</sup>Division of Organic Chemistry, Department of Chemistry, School of Sciences, Mansoura University, Mansoura-35516, Egypt

<sup>4</sup>Crop Genetics Department, John Innes Centre, Norwich NR4 7UH, United Kingdom

<sup>5</sup>Molecular Microbiology Department, John Innes Centre, Norwich NR4 7UH, United Kingdom

<sup>6</sup>Tsinghua-Peking Joint Center for Life Sciences, and School of Life Sciences, Tsinghua University, Beijing 100084, China

<sup>7</sup>Proteomics Facility, John Innes Centre, Norwich NR4 7UH, United Kingdom

<sup>‡</sup>These authors contributed equally to this work

<sup>\*</sup>To whom correspondence should be addressed.

Emails: [anne.osbourn@jic.ac.uk](mailto:anne.osbourn@jic.ac.uk); [guy.polturak@mail.huji.ac.il](mailto:guy.polturak@mail.huji.ac.il)

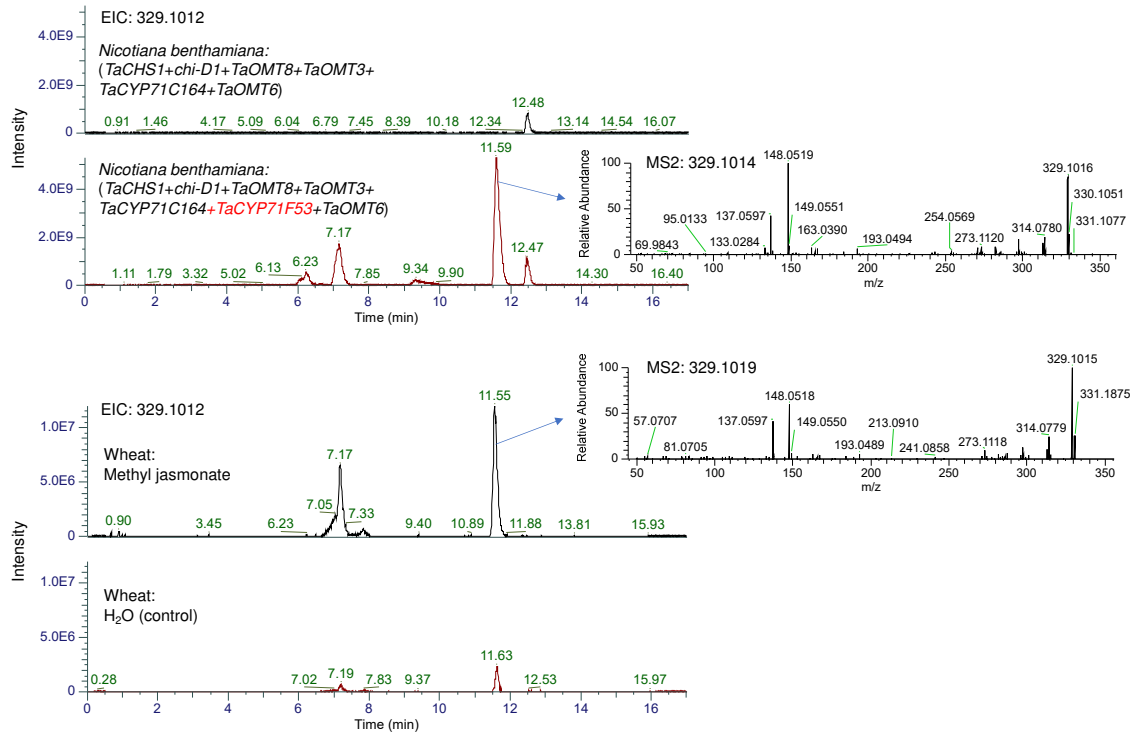

**Supplementary Fig. 1. Extracted ion chromatograms and MS2 fragmentation of ( $m/z$  329.1012) ion in wheat and *Nicotiana benthamiana*.** Top chromatograms, extract from *N. benthamiana* leaf infiltrated with BGC4(5D) genes (*TaCHS1*, *chi-D1*, *TaOMT8*, *TaOMT3*, *TaCYP71C164*, *TaCYP71F53*, *TaOMT6*), or with all genes excluding *TaCYP71F53* (control). Bottom chromatograms, extracts from methyl jasmonate-treated wheat blades (cv. Chinese Spring), or from control (water treated-blades).

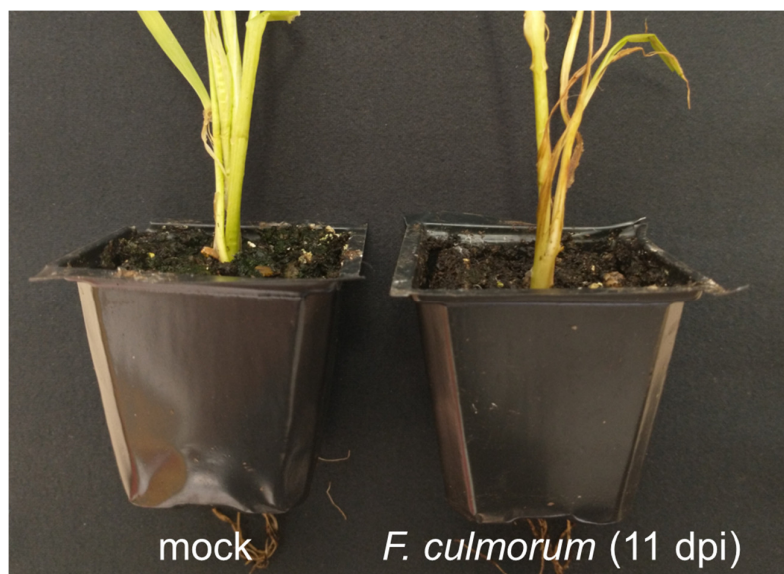

**Supplementary Fig. 2.** 'Chinese Spring' wheat plants infected with *F. culmorum* (isolate FC2021) or mock-treated. Image taken 11 days post infection.

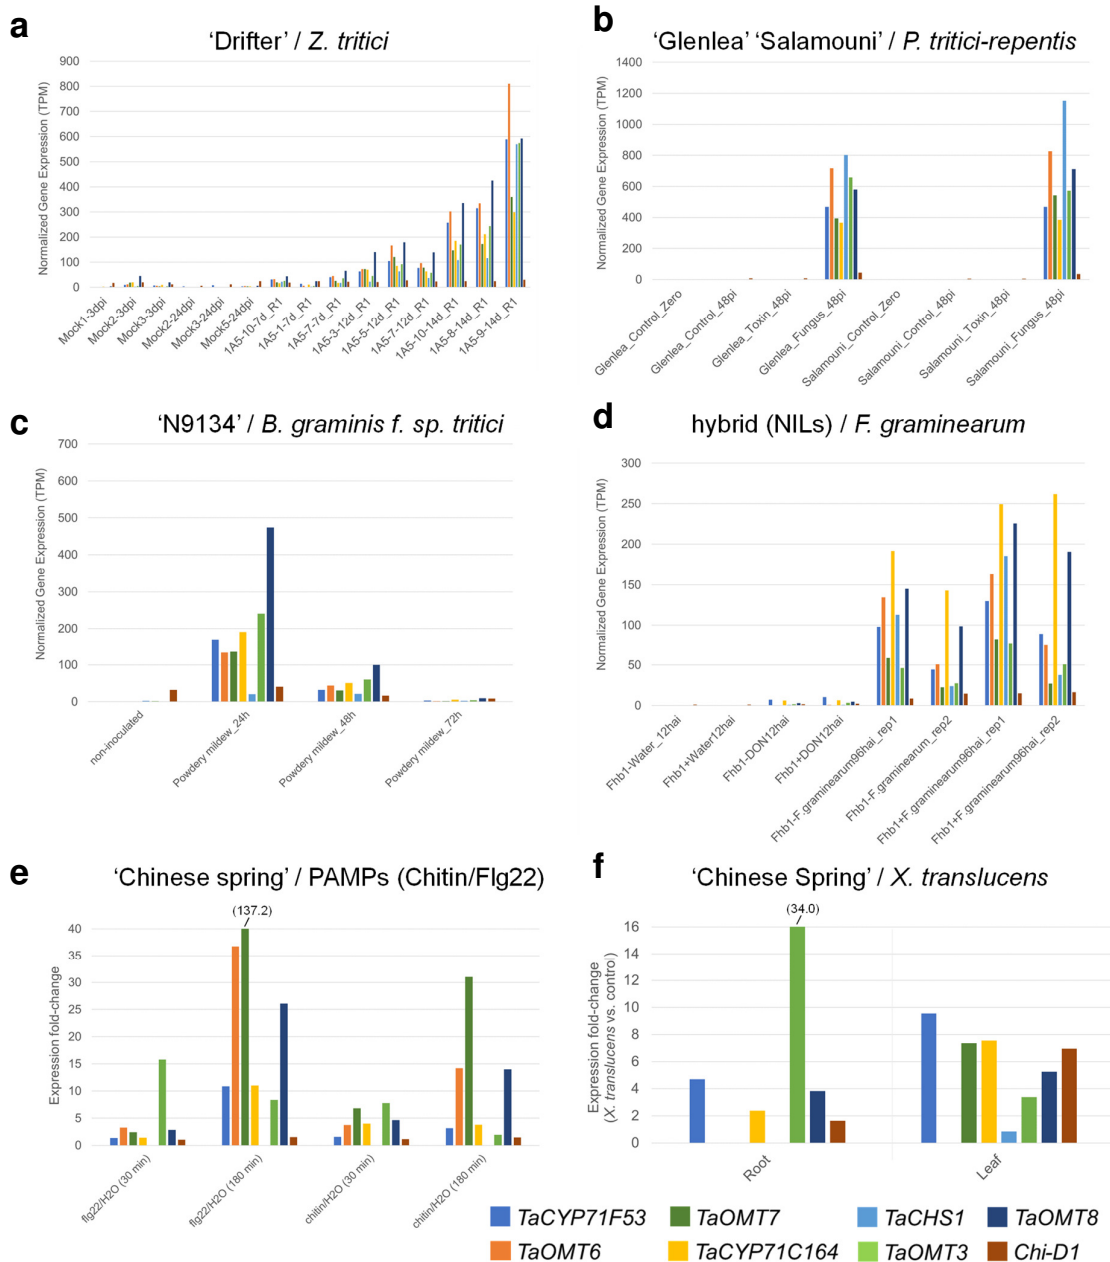

**Supplementary Fig. 3. Gene expression data of BGC4(5D) genes in six biotic stress experiments.** Normalized values (transcripts per million) (A-D) or expression fold-change (E-F) is shown, derived from RNA-seq data at Wheatomics 1.0<sup>1</sup> (<http://wheatomics.sdau.edu.cn/>). **a**, infection of wheat cv. 'Drifter' with *Zymoseptoria tritici*<sup>2</sup>. **b**, infection of wheat varieties 'Glenlea' and 'Salamouni' with fungal pathogen *Pyrenophora tritici-repentis* or infiltration with the toxin Ptr ToxA (<https://www.ncbi.nlm.nih.gov/bioproject/PRJNA327829>). **c**, infection of wheat line N9134 with powdery mildew (*Blumeria graminis f. sp. tritici*; *Bgt*)<sup>3</sup>. **d**, infection with *Fusarium graminearum* of wheat near isogenic lines that are resistant (Fhb1+) or susceptible (Fhb1-) to Fusarium head blight<sup>4</sup>. **e**, elicitation of cv. 'Chinese Spring' plants with PAMPs chitin or Flg22<sup>5</sup>. Fold-change of TPM values (treatment vs. control) is shown. **f**, infection of cv. 'Chinese Spring' plants with bacterial pathogen *Xanthomonas translucens*<sup>6</sup>. Fold-change of TPM values (expression following infection with *X. translucens* vs. control, in root or leaf tissue) is shown. Fold-change values are shown in brackets, where column exceeds Y-axis view.

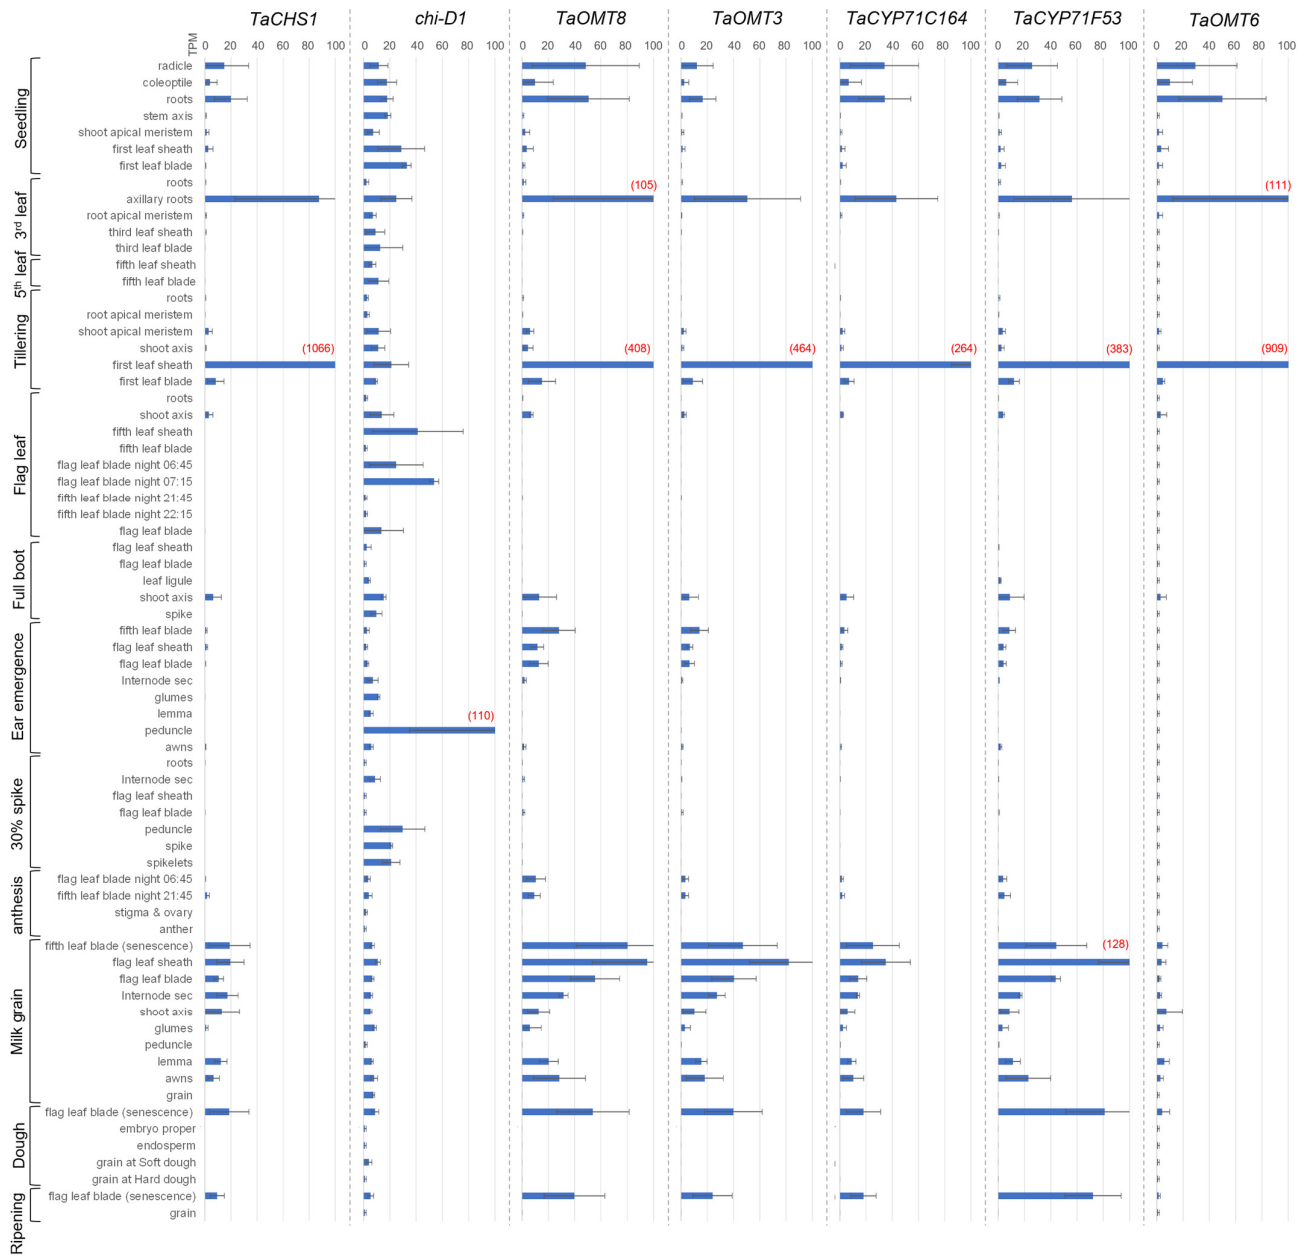

**Supplementary Fig. 4. Expression patterns of BGC4(5D) genes across tissues and developmental stages.** Transcript per million (TPM) values are shown for BGC4(5D) genes, in a developmental/time course RNA-seq analysis of wheat *cv. Azhurnaya*<sup>5</sup>. Expression data was extracted from Wheatomics 1.0<sup>1</sup> (<http://wheatomics.sdau.edu.cn/>) and wheat eFP browser<sup>7</sup> ([https://bar.utoronto.ca/efp\\_wheat/cgi-bin/efpWeb.cgi](https://bar.utoronto.ca/efp_wheat/cgi-bin/efpWeb.cgi)). TPM values are shown (in red, brackets) where they exceed the given scale.

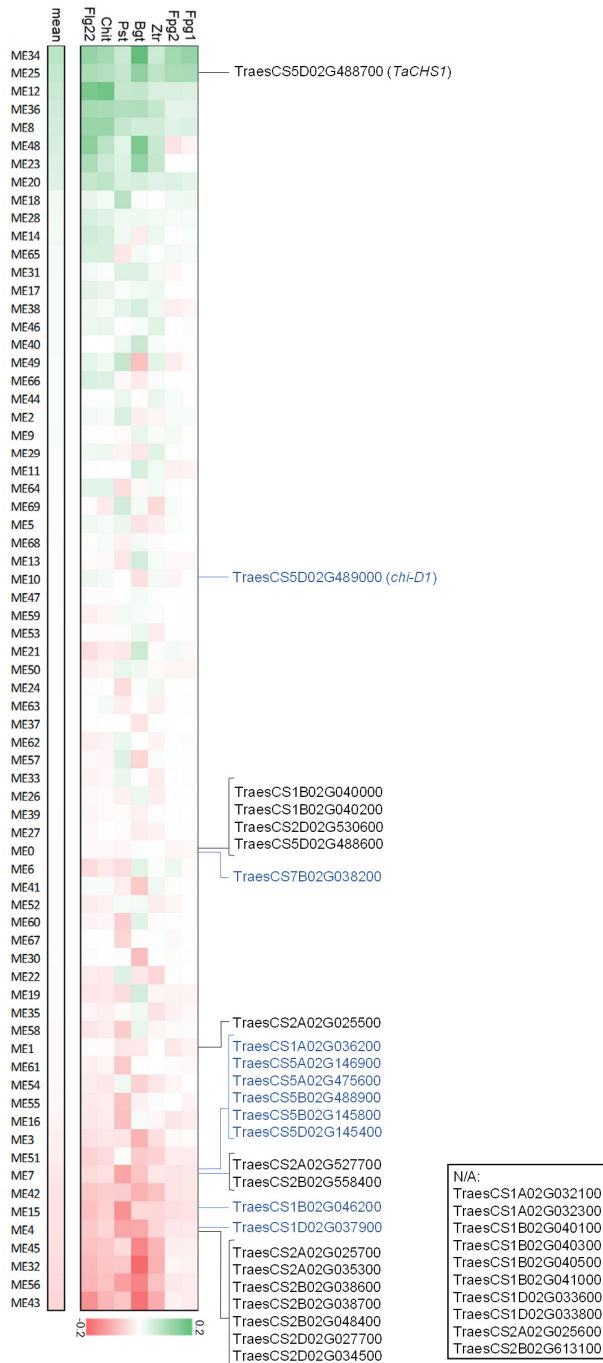

**Supplementary Fig. 5. Assignment of putative wheat *CHS* and *CHI* genes to gene expression modules of a biotic stress related WGCNA.** 69 gene expression modules are ordered from the most highly upregulated (top) to the most highly downregulated (bottom), following pathogen infection or treatment with chitin or flagellin. 25 Putative *CHS* genes (in black) and 10 putative *CHI* genes (in blue) were assigned to the different modules. N/A denotes unassigned (non-expressed) genes. Heatmap image adopted from Polturak et al.,<sup>8</sup>. Fpg1, *Fusarium pseudograminearum*; Fpg2, *Fusarium pseudograminearum*; Ztr, *Zymoseptoria tritici*; Bgt, *Blumeria graminis f. sp. tritici*; Pst, *Puccinia striiformis f. sp. Tritici*; Chit, chitin; Flg22, flagellin peptide.

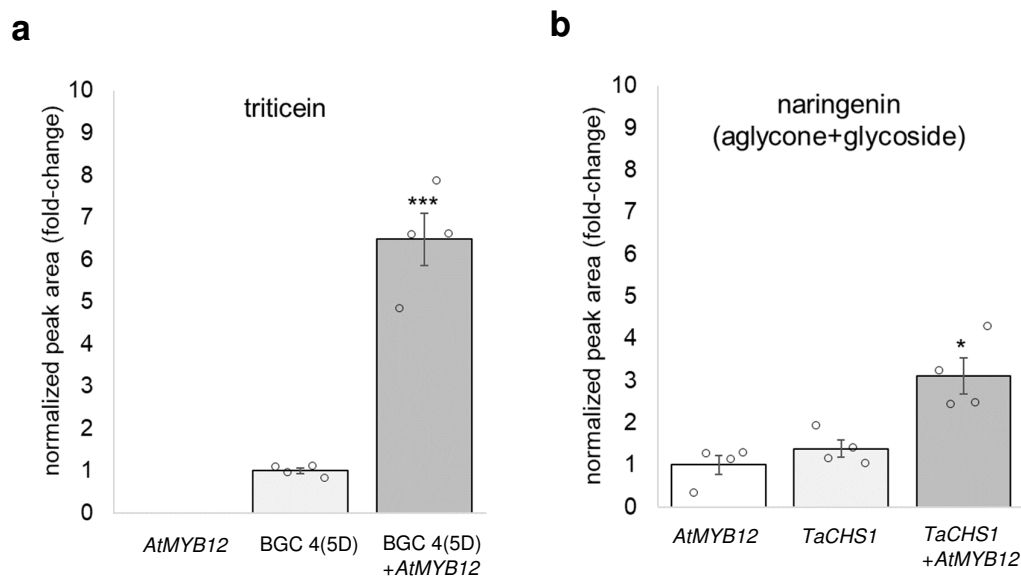

**Supplementary Fig. 6. Relative abundance of triticein and naringenin in agroinfiltrated *Nicotiana benthamiana* leaves.** **a**, relative abundance of triticein (**6**) in *N. benthamiana* leaves infiltrated with agrobacteria strains carrying expression vectors for *AtMYB12* only, BGC4(5D) genes (*TaCHS1*, *chi-D1*, *TaOMT8*, *TaOMT3*, *TaCYP71C164*, *TaCYP71F53*, *TaOMT6*), or co-infiltration of *AtMYB12* together with BGC(5D) genes. **b**, relative abundance of naringenin (**1**) in *N. benthamiana* leaves infiltrated with agrobacteria strains carrying expression vectors for *AtMYB12*, *TaCHS1*, or co-infiltration of both. Normalized peak area of naringenin is the sum of normalized peak areas of the aglycone ion ( $m/z$  273.0752) and the ion of the single glycosylated compound ( $m/z$  435.1274). Relative quantification values (in fold-change) indicate means of three biological replicates  $\pm$  SEM. Asterisks denote t-test statistical significance of differential expression. \*,  $p$ -val<0.05. \*\*\*,  $p$ -val<0.001. Exact  $p$ -values:  $1.21 \cdot 10^{-4}$  (panel a), 0.0112 (panel b). For panels a,b, n=4 (biological replicates). Source data are provided as a Source Data file.

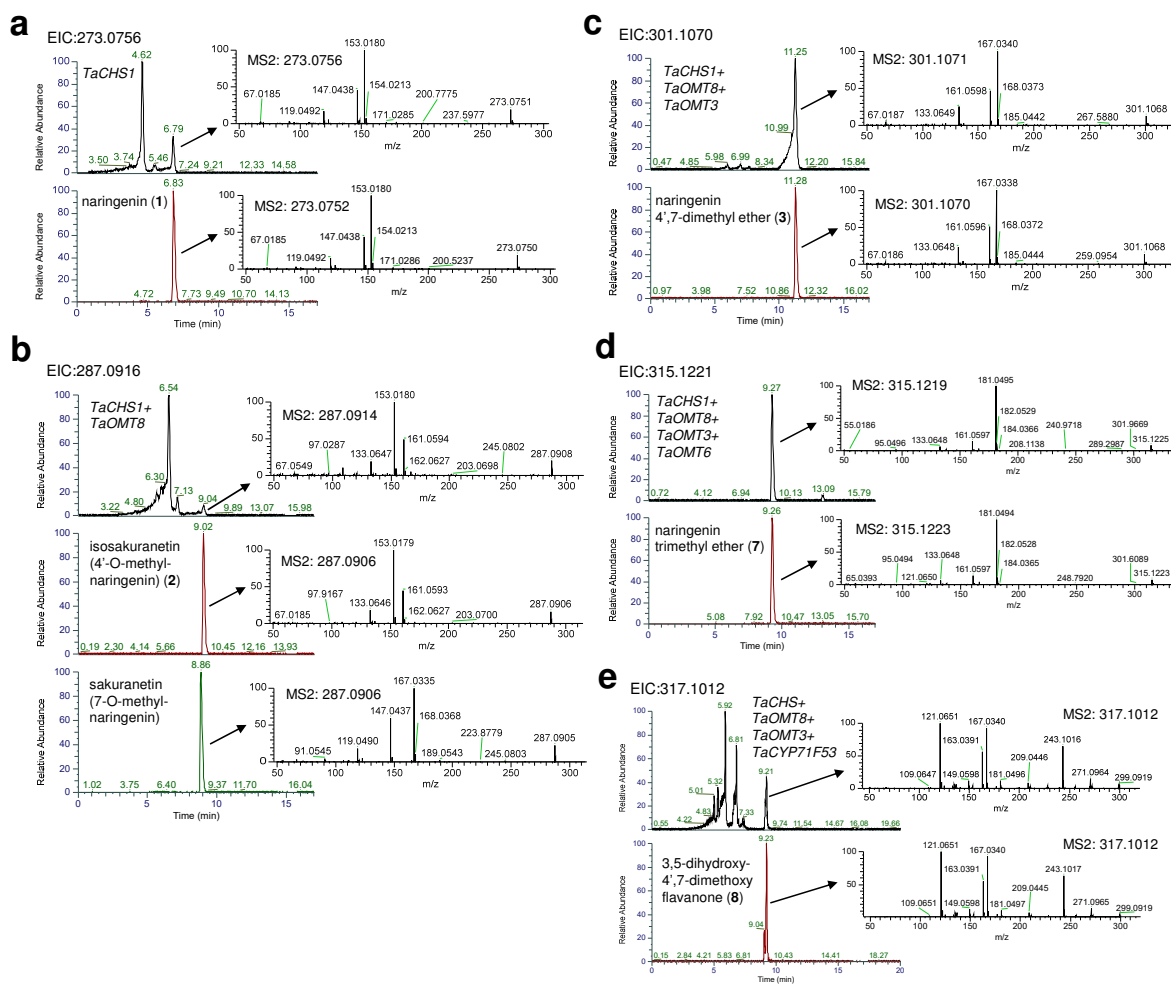

**Supplementary Fig. 7. Extracted ion chromatograms and MS2 spectra of BGC4(5D) pathway intermediates in *Nicotiana benthamiana*.** Chromatograms and MS2 spectra are shown for extracts of *N. benthamiana* leaves infiltrated with agrobacteria strains carrying expression vectors for genes from wheat BGC4(5D), and the corresponding commercial standards (panels A-D) or purified compound (panel E). **a**, expression of *TaCHS1* produces naringenin (**1**). **b**, co-infiltration of *TaCHS1* and *TaOMT8* produces isosakuranetin (**2**). **c**, co-infiltration of *TaCHS1*, *TaOMT8* and *TaOMT3* produces naringenin 4',7-dimethyl ether (**3**). **d**, co-infiltration of *TaCHS1*, *TaOMT8*, *TaOMT3* and *TaOMT6* produces naringenin trimethyl ether (**7**). **e**, co-infiltration of *TaCHS1*, *TaOMT8*, *TaOMT3* and *TaCYP71F53* produces 3,5-dihydroxy-4',7-dimethoxyflavanone (**8**).



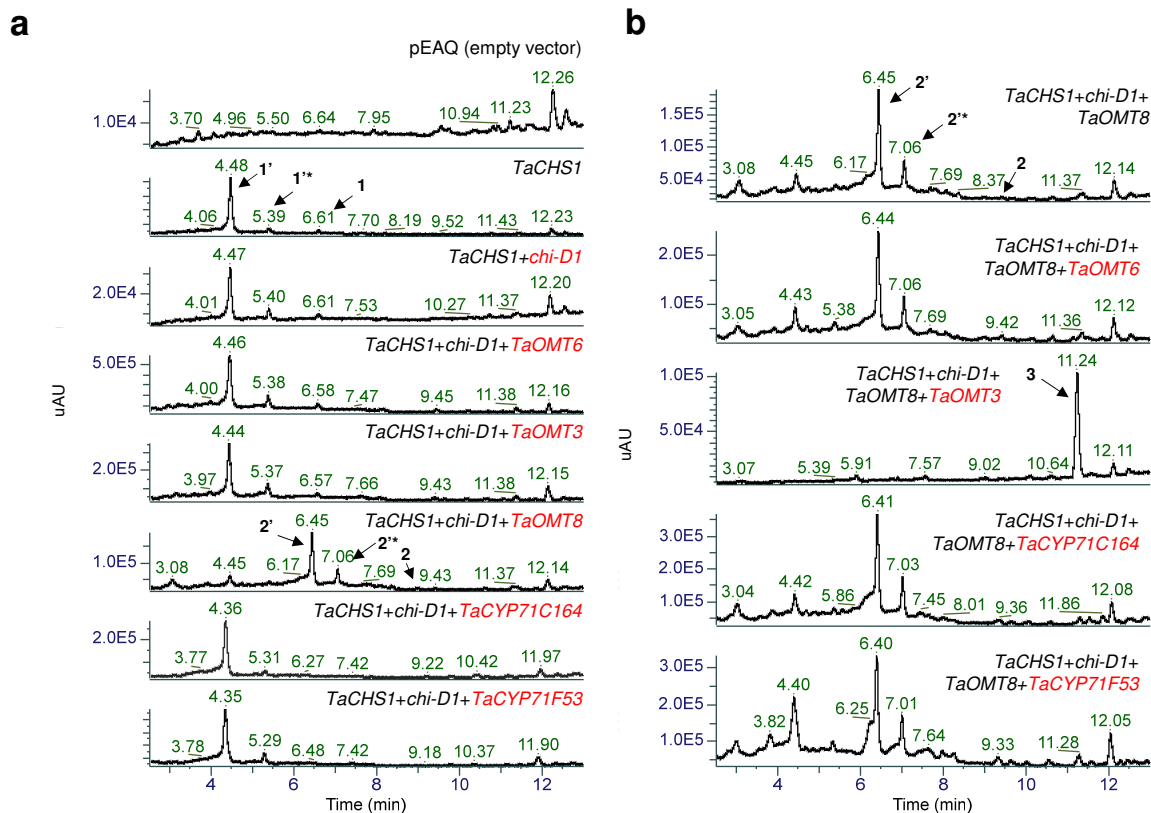

**Supplementary Fig. 8. Total scan photo diode array (PDA) chromatograms of combinatorial transient expression experiments in *Nicotiana benthamiana*.** **a**, expression of *TaCHS1* produces naringenin (**1**) and derivatives. Co-infiltration with *TaOMT8* produces isosakuranetin (**2**) and derivatives. **b**, additional expression of *TaOMT3* produces naringenin 4',7-dimethyl ether (**3**). Glycoside ('); diglycoside (''); malonyl-glycoside (\*). See Supplementary Table S1 for information on corresponding MS data of annotated peaks.

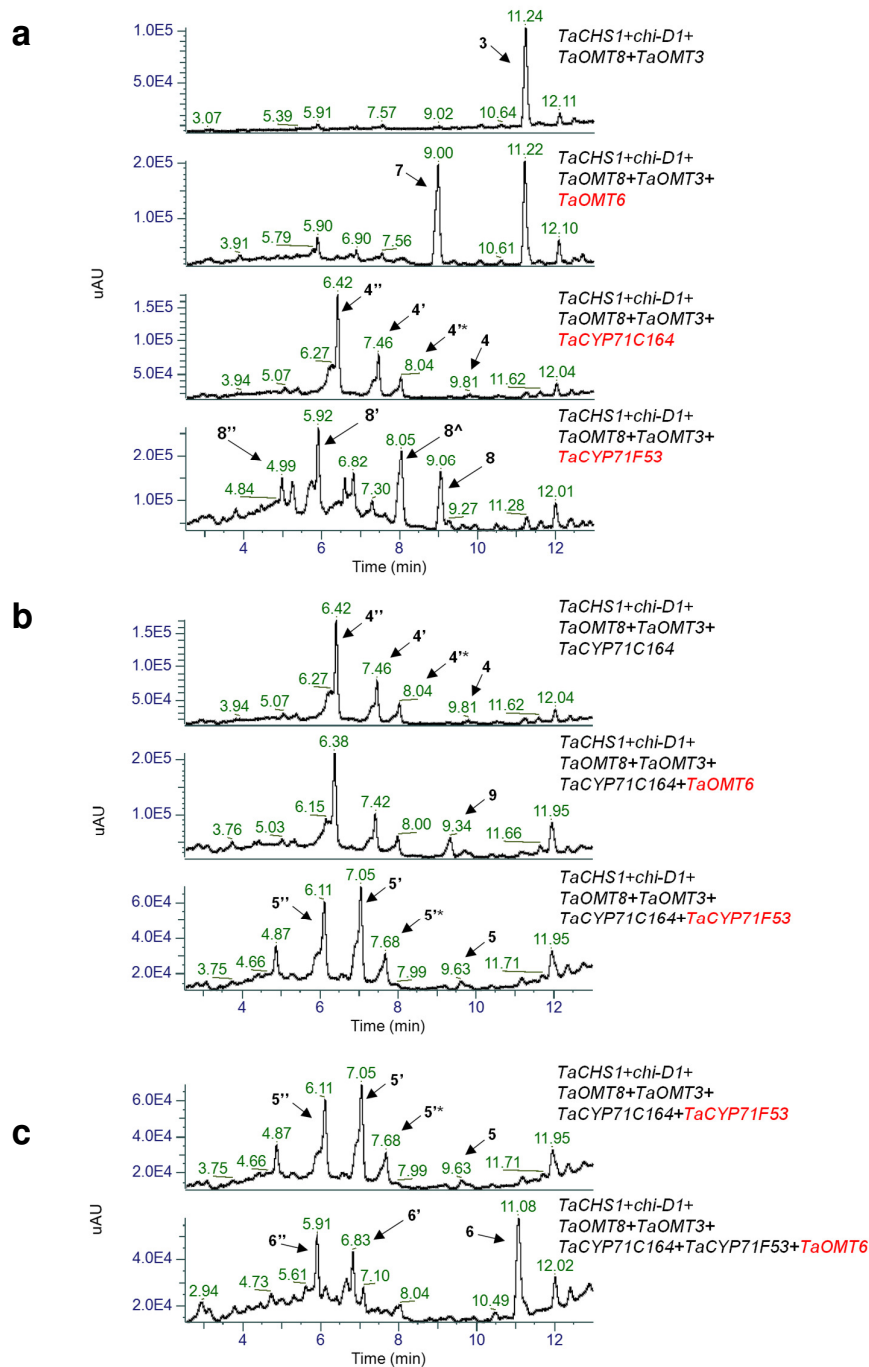

**Supplementary Fig. 9. Total scan photo diode array (PDA) chromatograms of combinatorial transient expression experiments in *Nicotiana benthamiana*.** **a**, additional expression of *TaOMT6*, *TaCYP71C164*, or *TaCYP71F53*, respectively converts naringenin 4',7-dimethyl ether (**3**) to naringenin trimethyl ether (**7**), artocarpanone A (**4**), or 3,5-dihydroxy-4',7-dimethoxyflavanone (**8**). **b**, additional expression of *TaOMT6* or *TaCYP71F53* respectively converts artocarpanone A (**4**) to 2',4',5-7-tetramethoxyflavanone (**9**), or 2'-*O*-demethyl-triticein (**5**). **c**, additional expression of *TaOMT6* converts 2'-*O*-demethyl-triticein (**5**) to triticein (**6**). Glycoside ('); diglycoside (''); malonyl-glycoside ('\*'); methyl ether (^). See Supplementary Table S1 for information on corresponding MS data of annotated peaks.

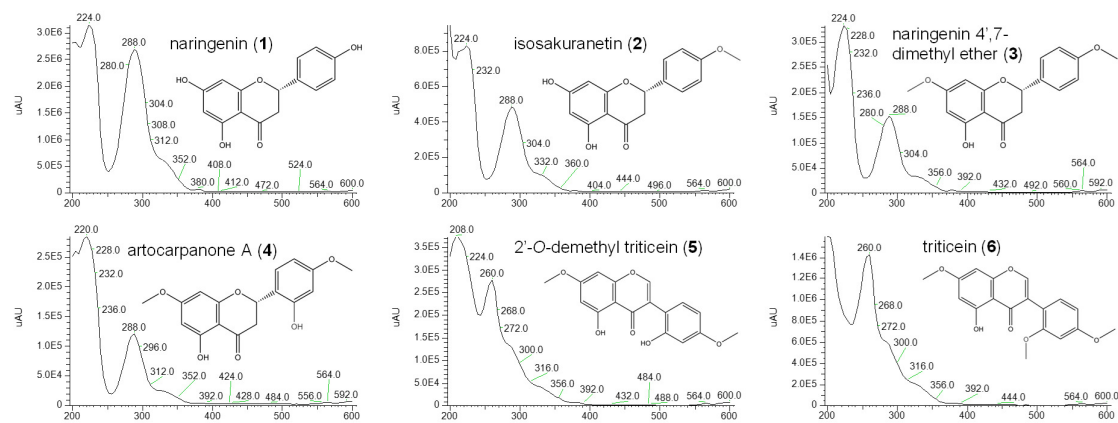

**Supplementary Fig. 10. UV-VIS spectra of triticein pathway intermediates.** Spectra are shown for three commercial standards (top row) and three purified compounds (bottom row).

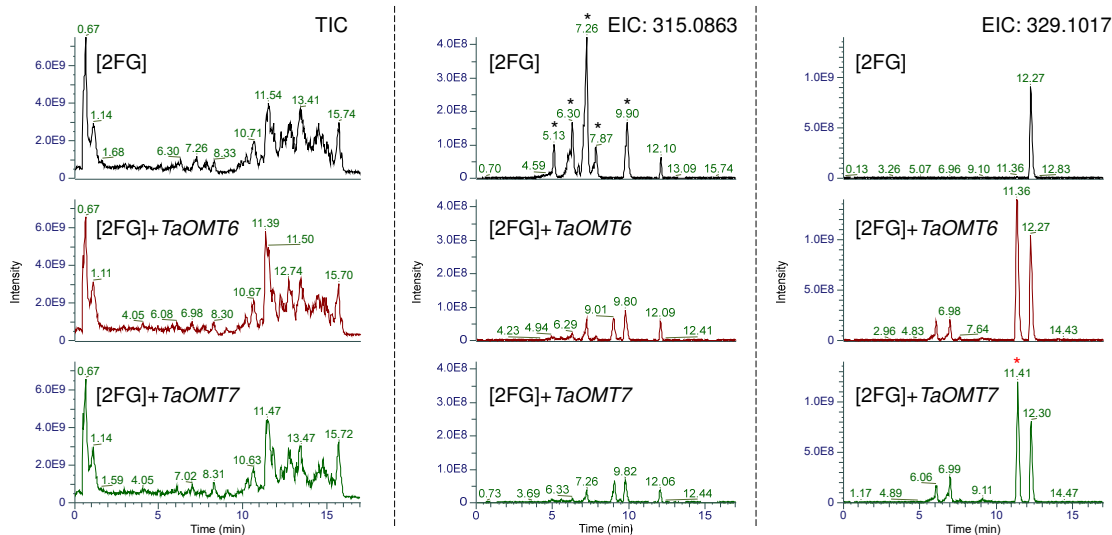

**Supplementary Fig. 11. Comparison of TaOMT6 and TaOMT7 2'-O-methyltransferase activity on 2'-O-demethyl-triticein.** LC-MS chromatograms of transient expression in *Nicotiana benthamiana*. Left- total ion chromatograms (TIC). Middle, extracted ion chromatograms for 2'-O-demethyl-triticein (**5**) ( $m/z$  315.0863). 2'-O-demethyl-triticein (Rt 9.9) and its glycosylated forms are marked with black asterisks. Right- extracted ion chromatograms for triticein ( $m/z$  329.1017), marked with red asterisk. 2FG, 2'-O-demethyl triticein-forming-genes.

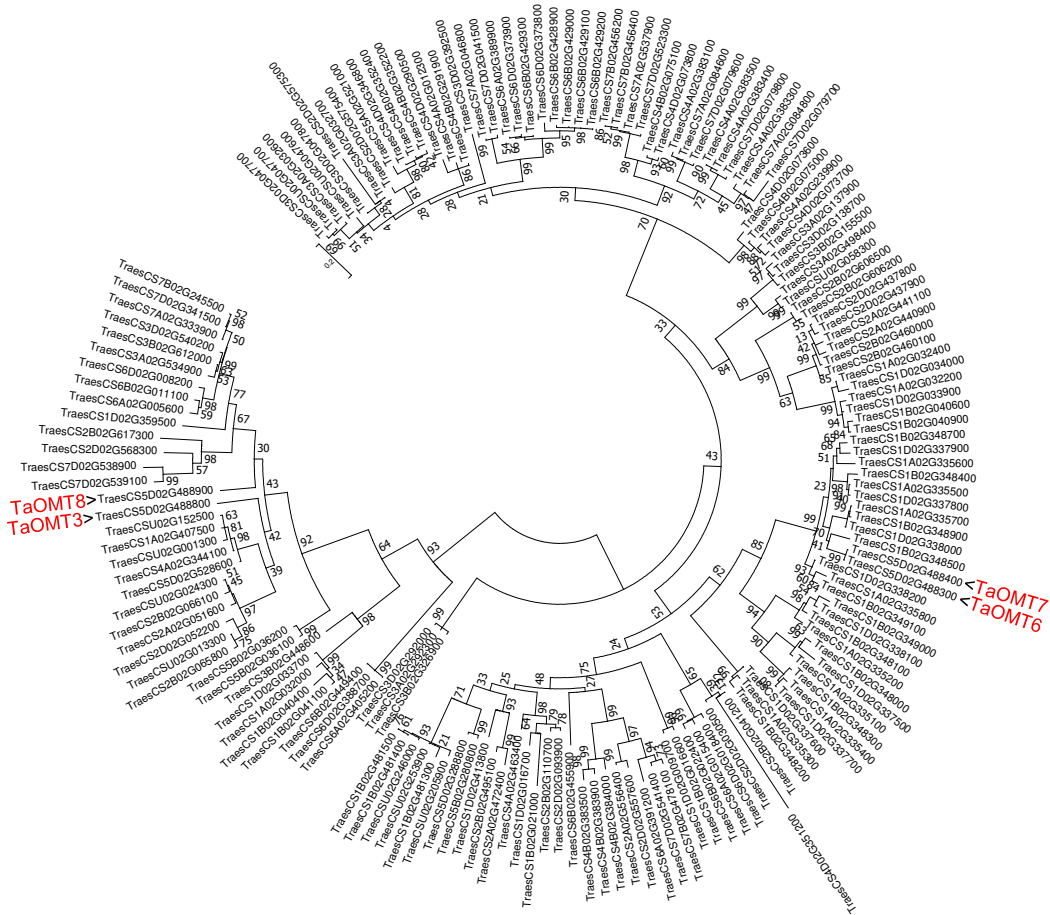

**Supplementary Fig. 12. Phylogeny of *Triticum aestivum* O-methyltransferases.** Maximum-likelihood tree was constructed for 165 O-methyltransferase protein sequences that include a ‘Methyltransf\_2’ Pfam domain (PF00891). The Sequences were aligned with Muscle algorithm and the tree was constructed with MEGA7<sup>9</sup>, using default parameters (with partial deletion, 95%) and 100 bootstraps.

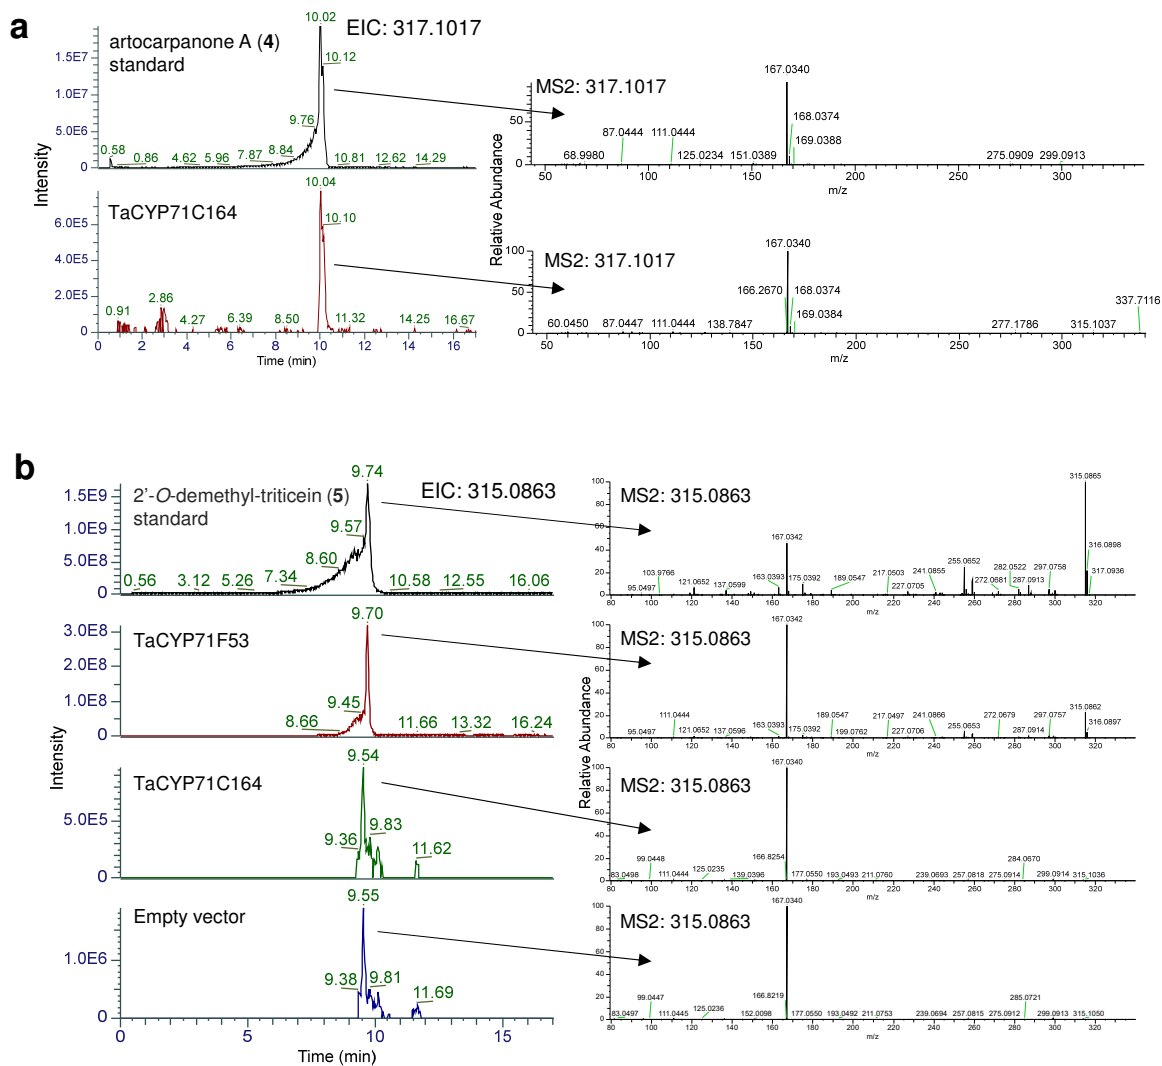

**Supplementary Fig. 13. *TaCYP71C164* and *TaCYP71F53* *in vitro* enzymatic assays. a**, extracted ion chromatograms and MS2 spectra of the  $[M+H]^+$  ion ( $m/z=317.1017$ ) for 2',5-dihydroxy-4',7-dimethoxyflavanone (artocarpanone A) (**4**). Top image, purified artocarpanone A. Bottom image, reaction containing microsomal fractions of yeast expressing *TaCYP71C164*, and the substrate naringenin 4',7-dimethyl ether (**3**). **b**, extracted ion chromatograms and MS2 spectra of the  $[M+H]^+$  ion ( $m/z=315.0863$ ) for 2',5-dihydroxy-4',7-dimethoxyisoflavone (2'-*O*-demethyl-triticein) (**5**). Top image, purified 2'-*O*-demethyl-triticein. Bottom images, reactions containing microsomal fractions of yeast expressing *TaCYP71F53*, *TaCYP71C164*, or empty vector control, and the substrate artocarpanone A (**4**).

Cad0227 (TaCYP71F53)

MEG\*TLCFIAVSTLVAVWFSGGKSKPKKHLPPGPWTLPVIGSLHHVLSVLPHRTITELCRRHGPIMLLKLGEVP  
TVVVSSAEAVEQVMKTNDIAFSYRRTTELQDIVGFGGKGIIFAPYDNRWRQMRKVCIMELLNSKQVKRMEDIRAE  
EVGRLLRSIITATAVGATVNISQKAAALSNAVVTRAVFGGKFARQEEYLREINQLLELLGGFCLVDLFPSSRLVR  
WFSTCERRTKKSCDLIQHIITGVLDERKVVRAAGDGACSTDDEDLLDVLLRLQEEDSLAYPLTTENIITVLFDIF  
AAGTDTTGTALEWAMSELICHPEAMAKAQLEVREVLGHGRAIIGNSDLAKLHYLRMVIKEVLRLHPPGALLPRKT  
REDCKIMGYDMLKDTNIYINVFAISRDPRYWNNPEEFNPGRFENNVDYNGNSFEFTPFGGGRRQCPGIAFATSL  
LEITLANFLYHFNWMLPGEASSASLDMSEKFGFTIGRTSNLHLKAIPYVRSTI

$\frac{\text{GGT TGG}}{\text{G W}} \text{---} \rightarrow \frac{\text{GGT TGA}}{\text{G *}}$

Cad1793 (TaCYP71F53)

MEGWLTLCFIAVSTLVAVWFSGGKSKPKKHLPPGPWTLPVIGSLHHVLSVLPHRTITELCRRHGPIMLLKLGEVP  
TVVVSSAEAVEQVMKTNDIAFSYRRTTELQDIVGFGGKGIIFAPYDNRWRQMRKVCIMELLNSKQVKRMEDIRAE  
EVGRLLRSIITATAVGATVNISQKAAALSNAVVTRAVFGGKFARQEEYLREINQLLELLGGFCLVDLFPSSRLVR  
WFSTCERRTKKSCDLIQHIITGVLDERKVVRAAGDGACSTDDEDLLDVLLRLQEEDSLAYPLTTENIITVLFDIF  
AAGTDTTGTALEWAMSELICHPEAMAKAQLEVREVLGHG\* AIGNSDLAKLHYLRMVIKEVLRLHPPGALLPRKT  
REDCKIMGYDMLKDTNIYINVFAISRDPRYWNNPEEFNPGRFENNVDYNGNSFEFTPFGGGRRQCPGIAFATSL  
LEITLANFLYHFNWMLPGEASSASLDMSEKFGFTIGRTSNLHLKAIPYVRSTI

$\frac{\text{GGC CGA}}{\text{G R}} \text{---} \rightarrow \frac{\text{GGC TGA}}{\text{G *}}$

Cad1682 (TaOMT3)

MGSTAVEKVAVATGDEEACMYAVKLAASILPMTLKNAIELGMLEIIVGAGGKMLSPSEVAA\*LPSKANPEAPVM  
VDRMLRLLASNNVSCEVEEGDGLLARRYGPAPVCKWLTPNEDGASMAGLLLMTHDKVTMESWYLKDVALEGG  
QPFHRAHGMTAYEYNSTDPRANCLFNEAMLNHSTIITKKLLEFYRGFDNVETLVDVAGGVGATAHATSKYPHIK  
GVNFDLPHVISEAPPYPGVQHIAGDMFKKVPSGDAILKWILHNWTDDYCMTLLRNCYDALPMNGKVVIEGILP  
VKPDAMPSTQTMFQVDMMLLHTAGGKERELSEFELAKGAGFSTVKTSYTSTAWVIEFVK

$\frac{\text{GCG CAG}}{\text{A Q}} \text{---} \rightarrow \frac{\text{GCG TAG}}{\text{A *}}$

Cad1684 (TaOMT8)

MGSISDEAACIYAMQLAAAAVLPMTLKNAIELGMIEIIVGAGGKMLSPSEVAAQLPSTANAEAPAIVDRMLRLL  
ASHNVSCEVEEGDGRLARRYGTAPVCKWLSPDEDGVSLAPMVLLNDKVMLES\*VHLKDTVINGGLPFEKAYGM  
TAFDYQGTDPRFNRVFNEAMKTHSMIITKKLLEFYKGFDGVGTLVDVGGVGATIHTILCRYPSIEGVNFDLPHV  
ISEAPSFAGVHHIGGDMFKKVPSGDAILMKWILHDWNDEHCTTLLSNCYDALPAHGKVIVEYILPVKPDETATA  
QRSFEADMIMLTHTPGGKERYLREYELARSAGFASVKATYVYSNIWVIELNK

$\frac{\text{AGC TGG}}{\text{S W}} \text{---} \rightarrow \frac{\text{AGC TGA}}{\text{S *}}$

Supplementary Fig. 14. DNA sequence mutations in four independent cv. ‘Cadenza’ wheat TILLING lines, resulting in premature stop codons for three genes from BGC4(5D).

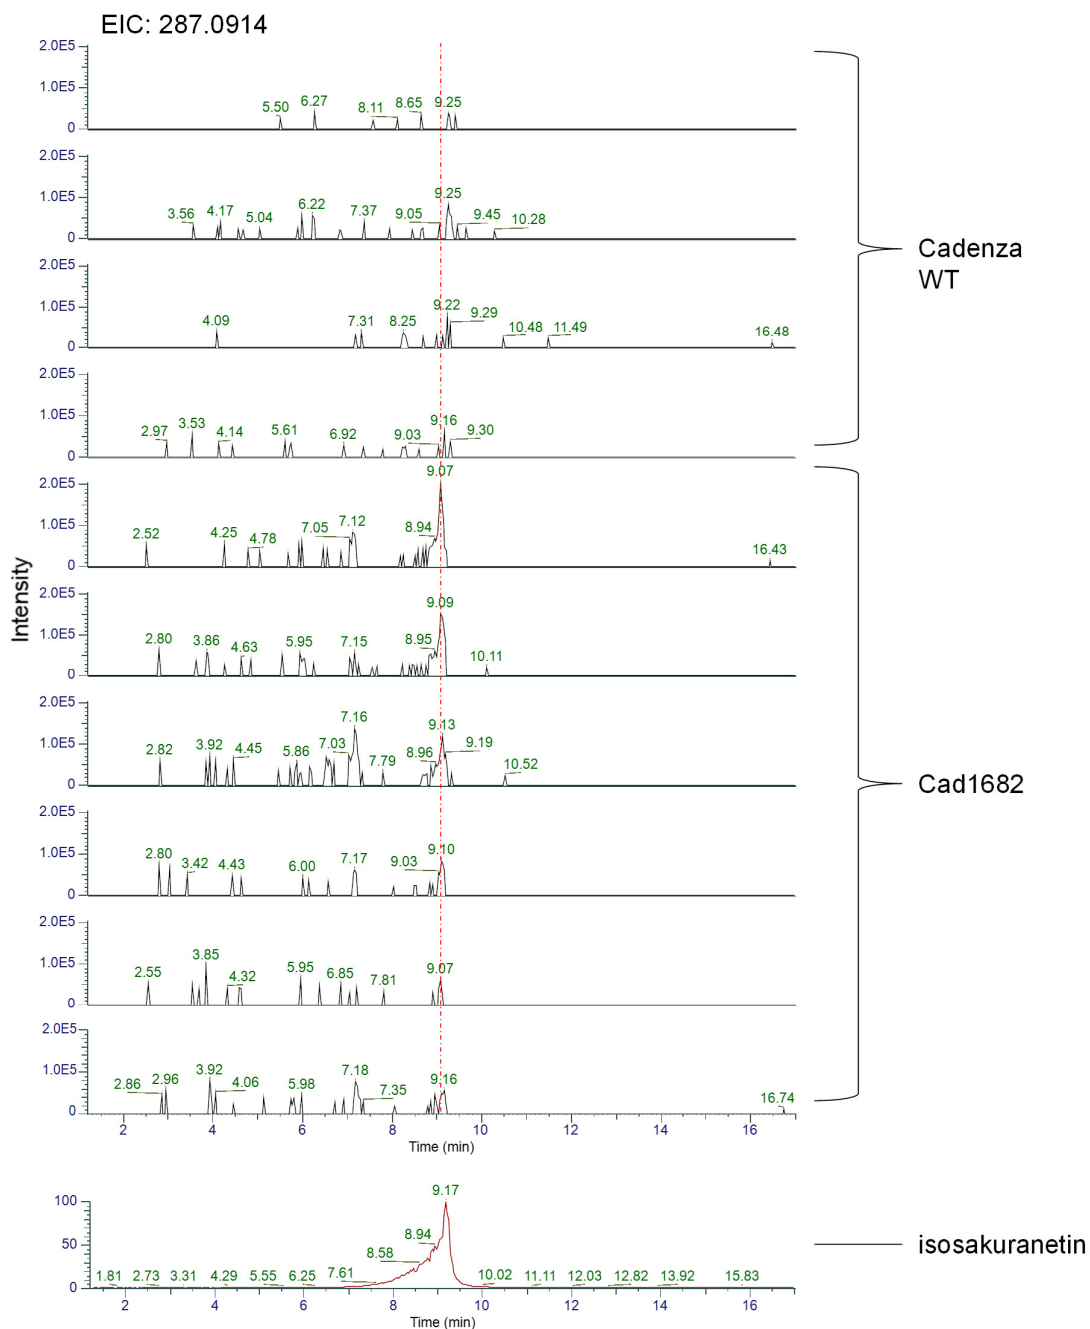

**Supplementary Fig. 15. Extracted ion chromatograms of the  $[M+H]^+$  ion for isosakuranetin.** EIC are shown for blade extracts from four plants of the Cadenza parent line, and six plants of the Cad1682 line. Y-axes are linked. EIC of isosakuranetin (**2**) standard is shown for reference.



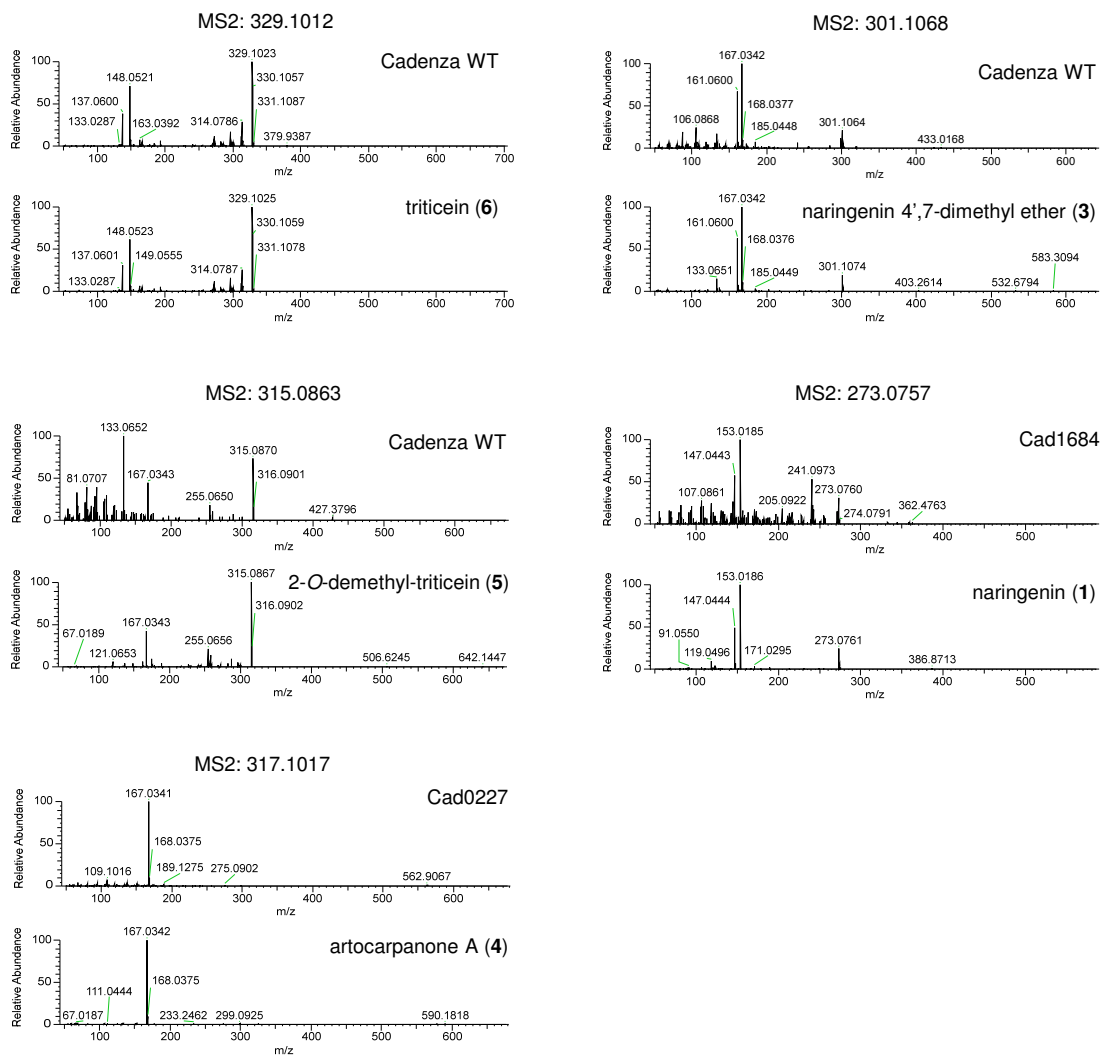

**Supplementary Fig. 16. Selected MS2 spectra from wheat TILLING lines blade extracts.** Triticein (6) and pathway intermediates were identified in extracts from wheat Cadenza wildtype parent or TILLING mutant lines, based on MS2 fragmentation of ions with corresponding accurate masses and retention times, and comparison with commercial standards or purified compounds.

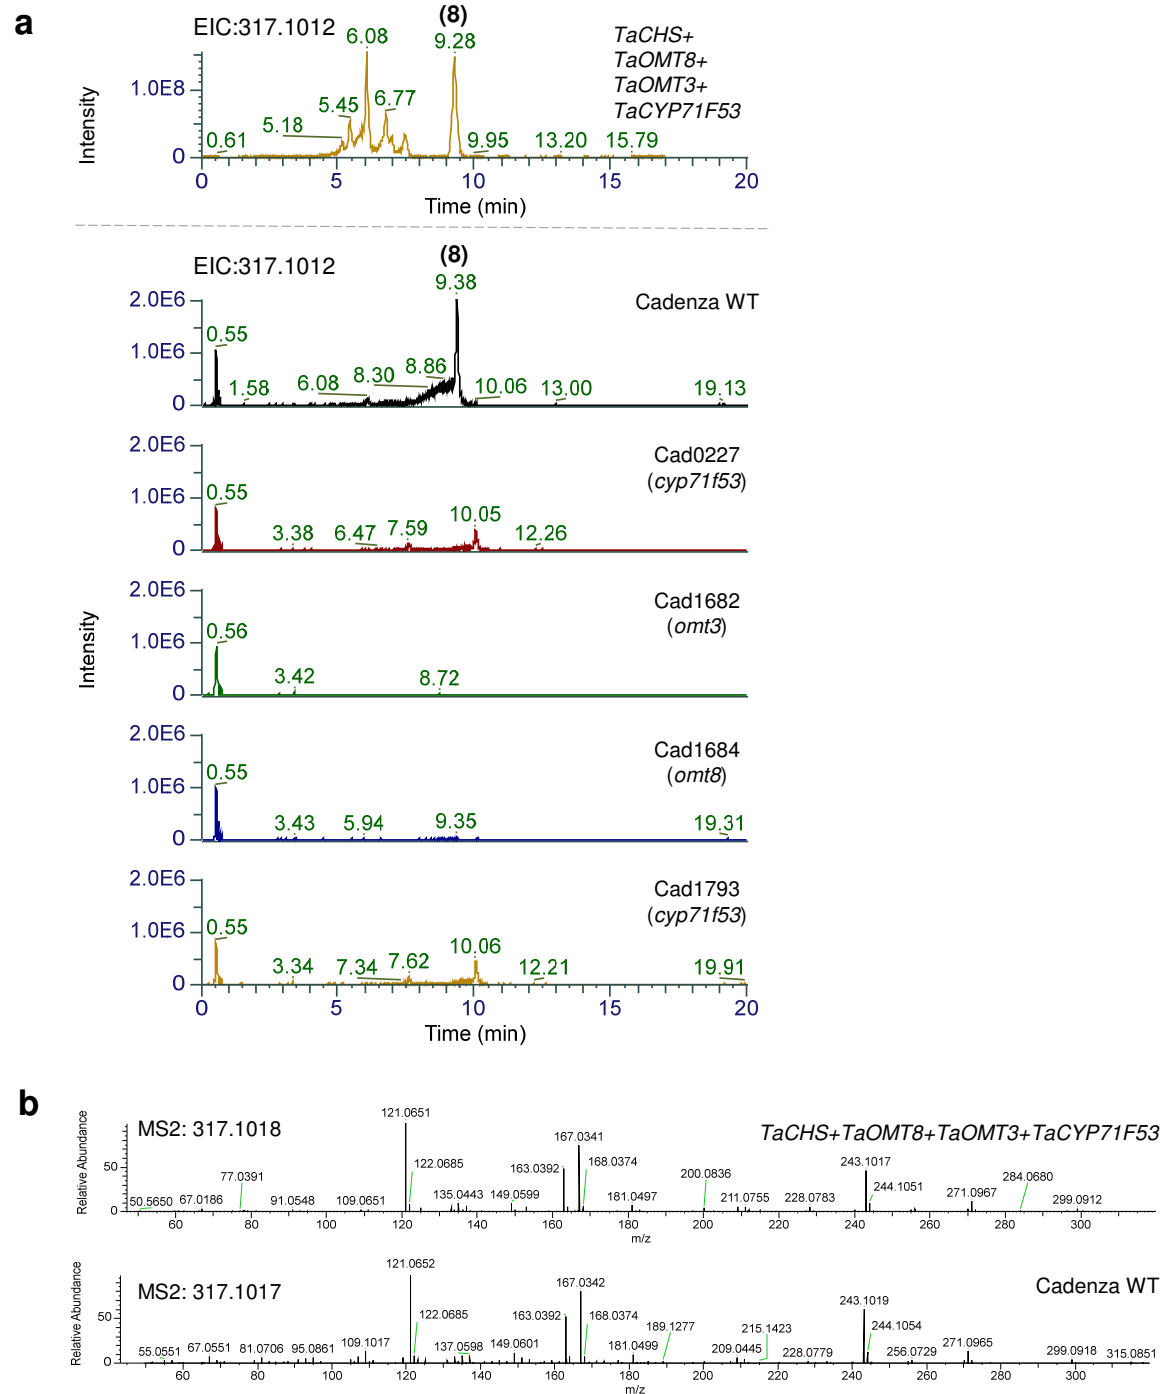

**Supplementary Fig. 17. 3,5-dihydroxy-4',7-dimethoxyflavanone (8) is detected in Cadenza wildtype lines. a**, extracted ion chromatograms of the  $[M+H]^+$  ion of (8), in agroinfiltrated *N. benthamiana* leaves (top chromatogram), and wheat Cadenza TILLING lines (bottom five chromatograms). **b**, MS2 spectra for corresponding peaks in *N. benthamiana* (top) and wheat (bottom).

**a**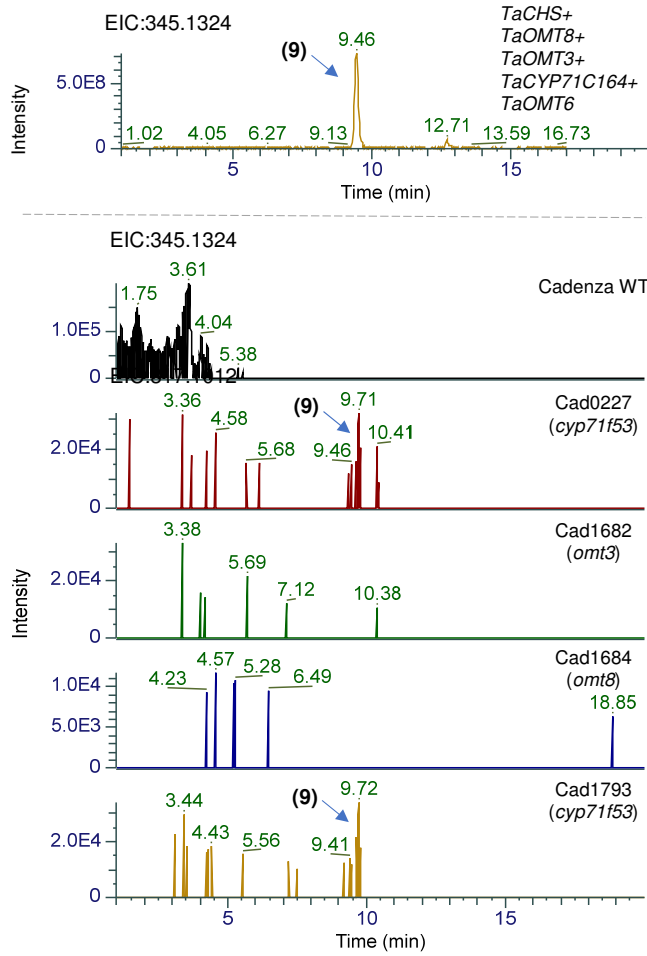**b**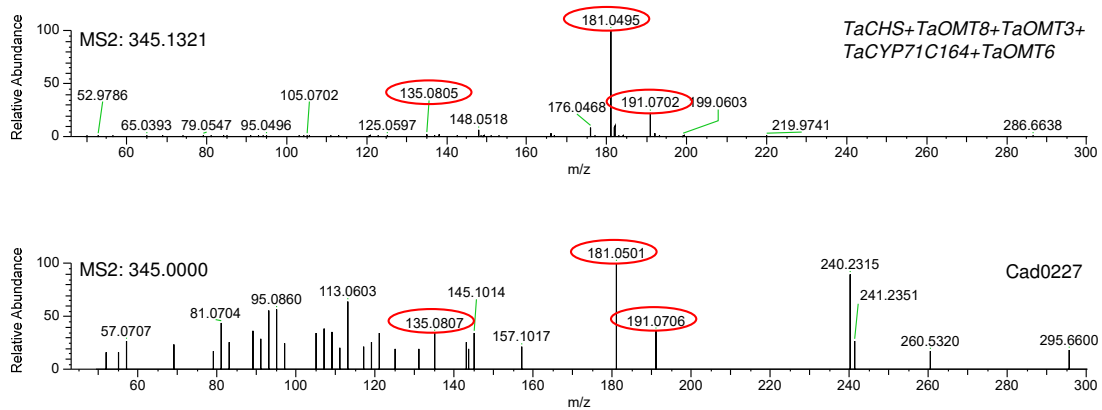

**Supplementary Fig. 18. 2',4',5,7-tetramethoxyflavanone (9) is detected in Cadenza *cyp71f53* mutant lines. a**, extracted ion chromatograms of the [M+H]<sup>+</sup> ion of (9), in agroinfiltrated *N. benthamiana* leaves (top chromatogram), and wheat Cadenza TILLING lines (bottom five chromatograms). **b**, MS2 spectra for corresponding peaks in *N. benthamiana* (top) and wheat (bottom).

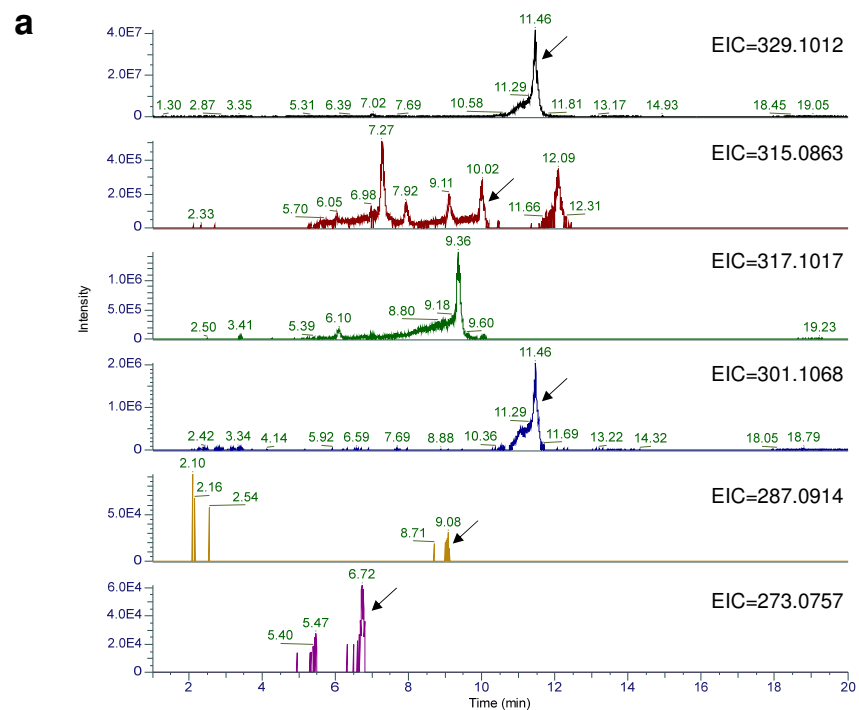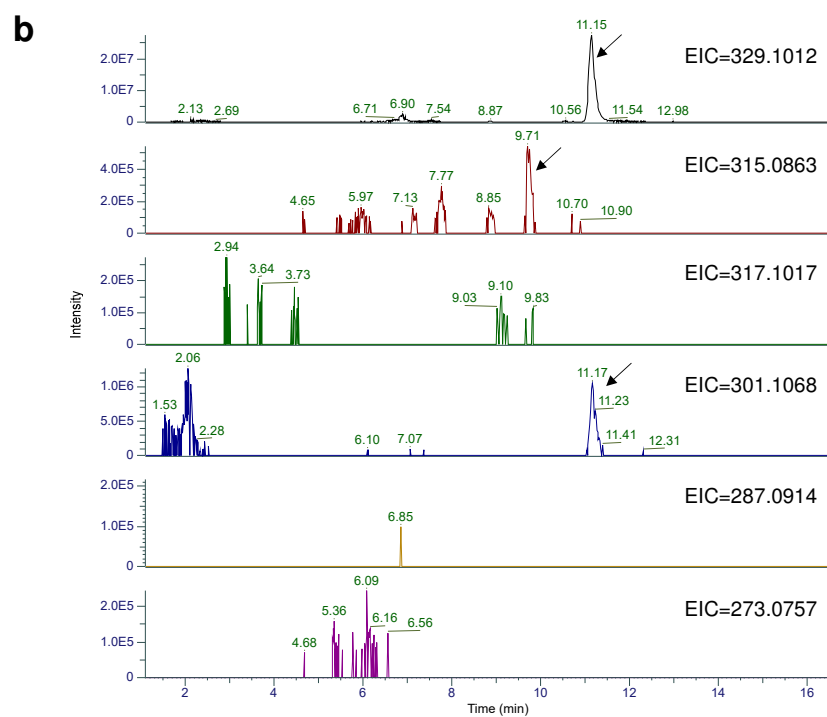

**Supplementary Fig. 19. Triticein is more abundant than pathway intermediates in blades from both Chinese Spring and Cadenza cultivars.** From top to bottom, extracted ion chromatograms of masses corresponding with  $[M+H]^+$  ions for triticein (**6**), 2'-*O*-demethyl-triticein (**5**), artocarpanone A (**4**), naringenin 4',7-dimethyl ether (**3**), isosakuranetin (**2**), naringenin (**1**). Arrows mark peaks representing the relevant compounds, where observed. **a**, Cadenza. **b**, Chinese Spring.

*F. culmorum*, 3 dpi

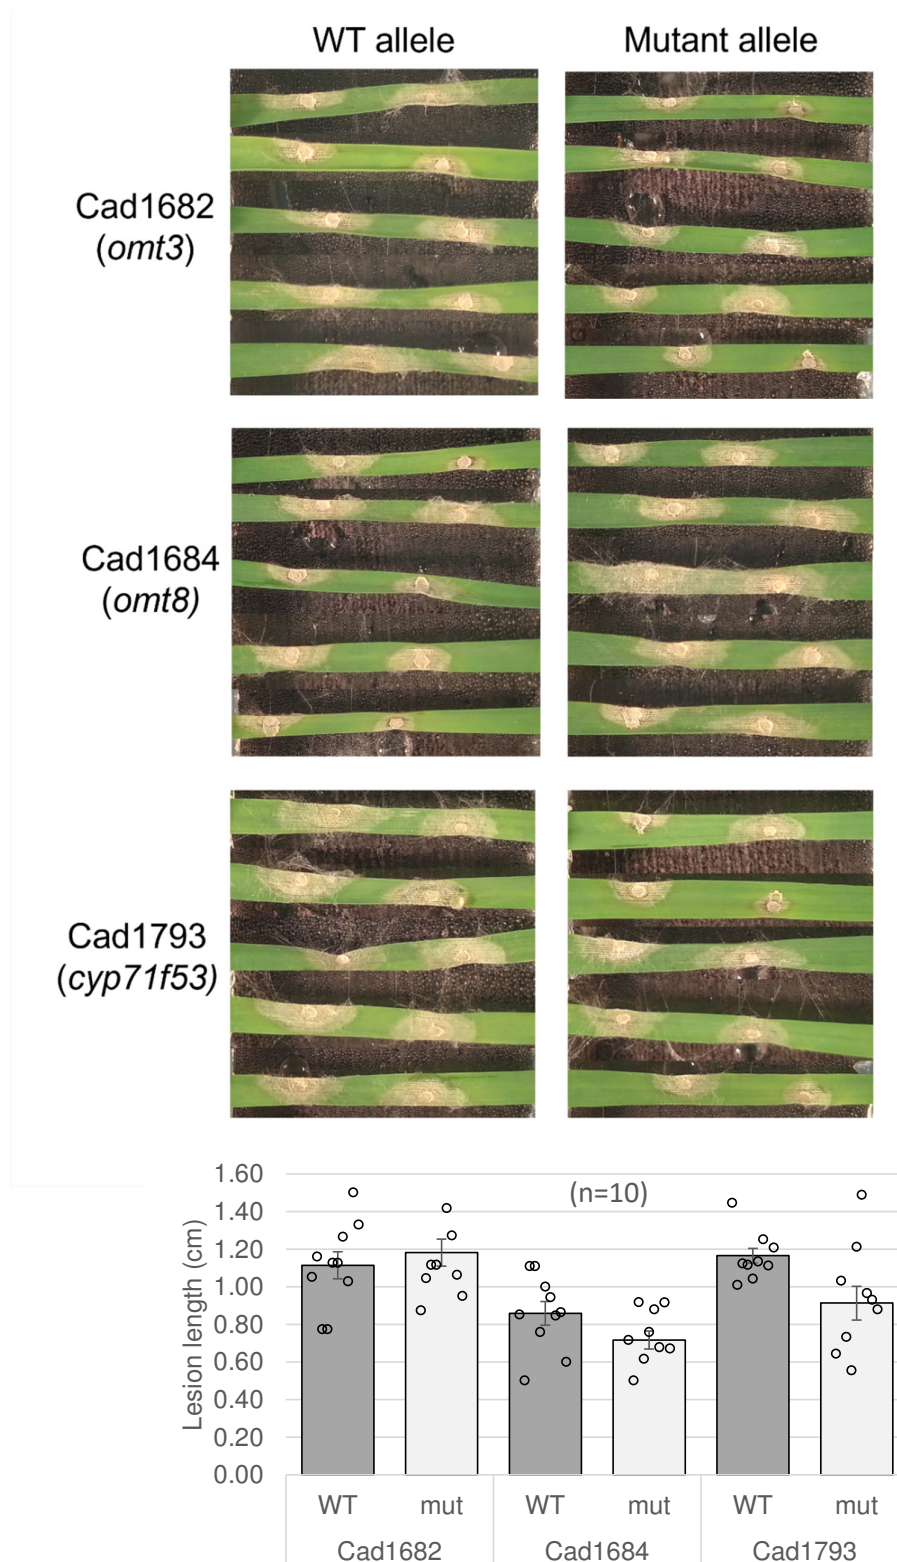

**Supplementary Fig. 20. *Fusarium culmorum* infection of wheat blades.** Detached leaves from wheat TILLING lines (cv. Cadenza) were infected with *F. culmorum* (isolate FC2021). Lesion lengths across infection points were measured 3 days post infection. n=10 (number of lesions measured). Source data are provided as a Source Data file.

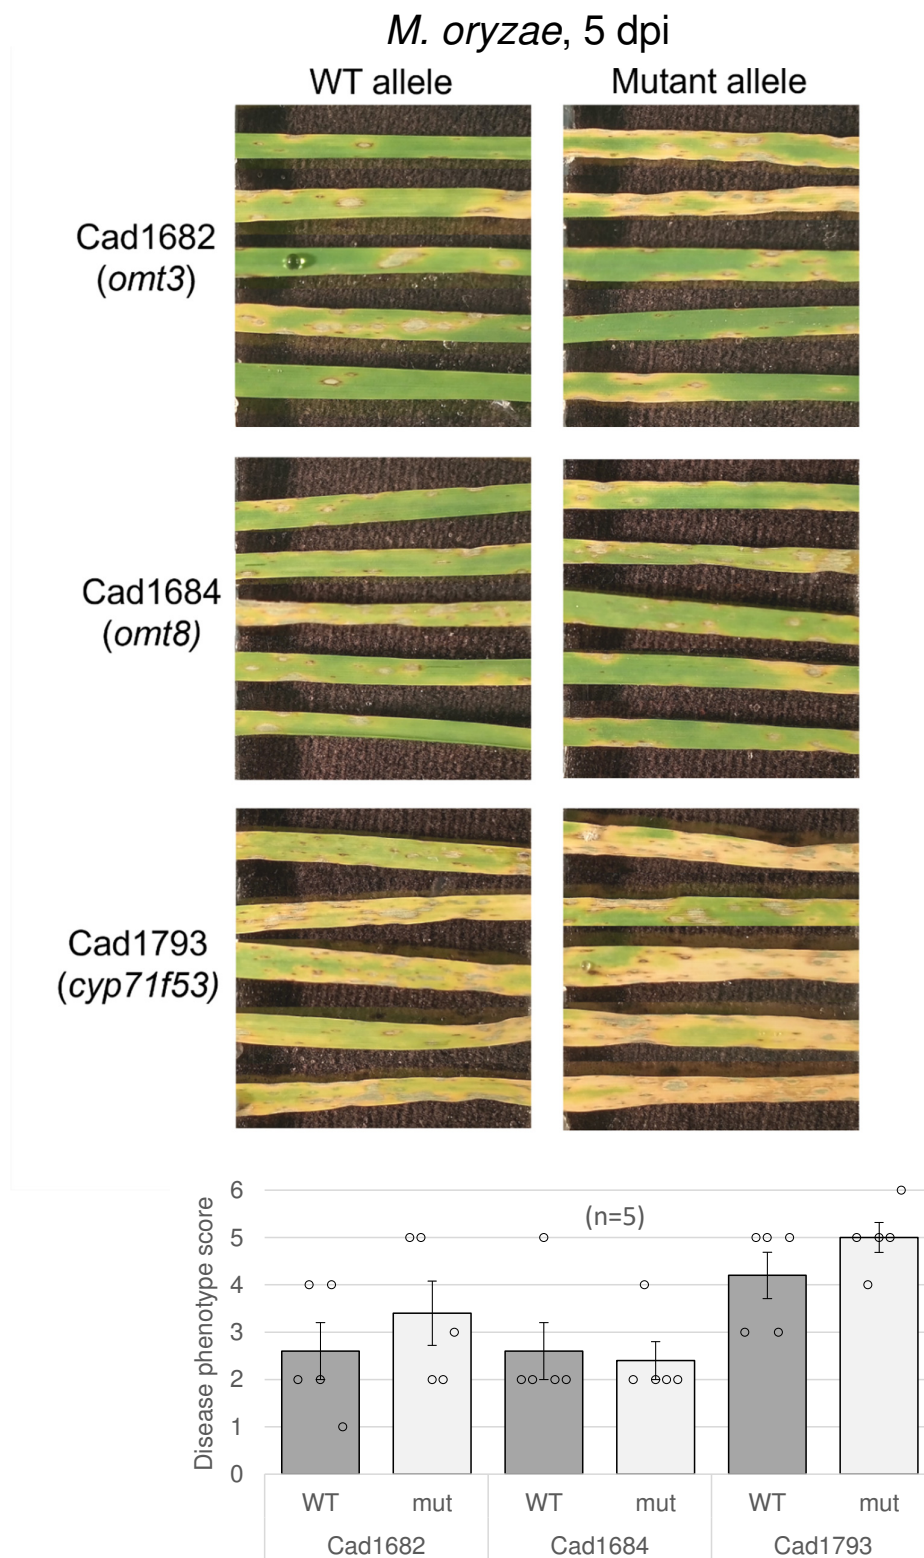

**Supplementary Fig. 21. *Magnaporthe oryzae* infection of wheat blades.** Detached leaves from wheat TILLING lines (cv. Cadenza) were infected with *M. oryzae* (isolate BTJ4P). Disease phenotype was scored five days post infection, based on a scale of 0 (lowest susceptibility) to 6 (highest susceptibility)<sup>10</sup>. n=5 (number of blades scored). Source data are provided as a Source Data file.

*B. graminis f. sp. tritici*, 7 dpi

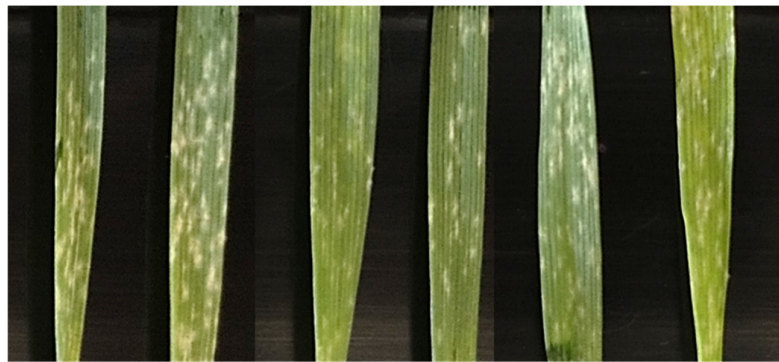

| WT             | mut | WT            | mut | WT                | mut |
|----------------|-----|---------------|-----|-------------------|-----|
| Cad1682        |     | Cad1684       |     | Cad1793           |     |
| <i>(omt33)</i> |     | <i>(omt8)</i> |     | <i>(cyp71f53)</i> |     |

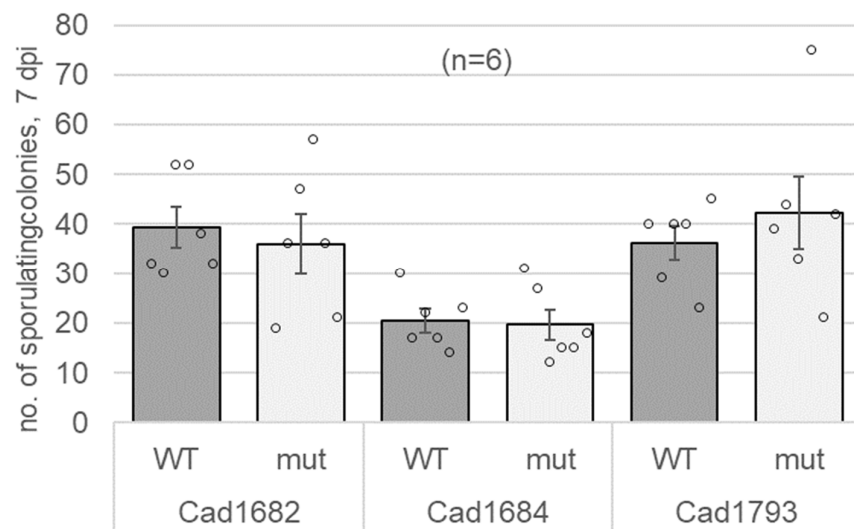

**Supplementary Fig. 22. Powdery mildew infection of wheat blades.** Detached leaves from wheat TILLING lines (cv. Cadenza) were infected with powdery mildew (*B. graminis f. sp. tritici*, isolate CAW14S6313). Observable sporulating colonies on the blade segments were counted 7 days post infection. n=6 (number of blades analyzed). Source data are provided as a Source Data file.

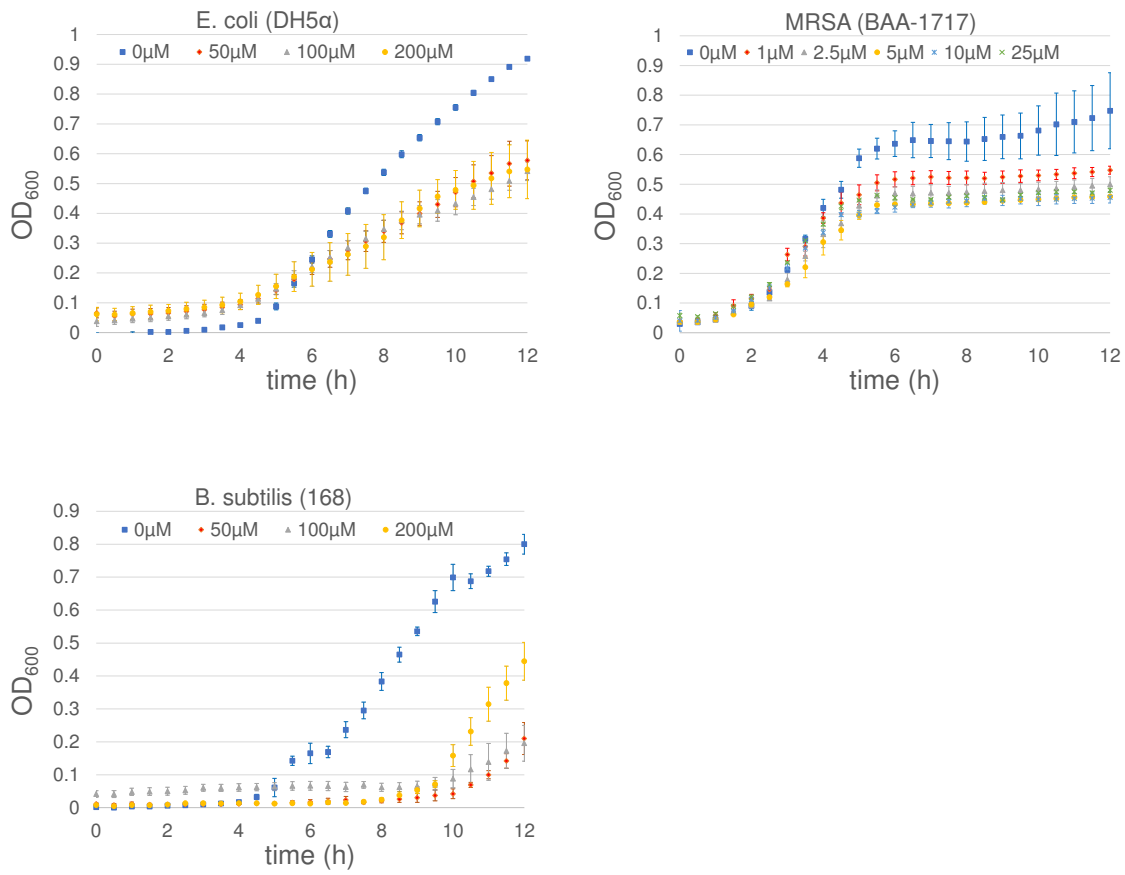

**Supplementary Fig. 23.** Bacterial growth inhibition assays in liquid LB media containing 50-200 μM triticein, or 1-25 μM triticein. n=3 (number of biological replicates). Source data are provided as a Source Data file.



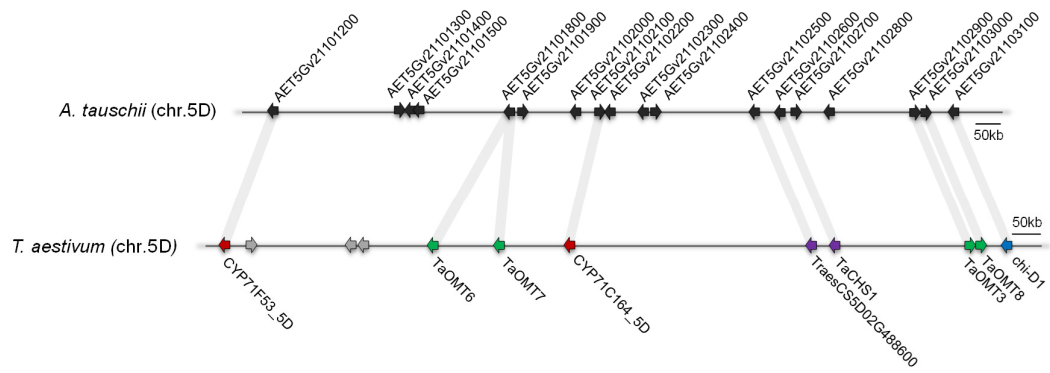

**Supplementary Fig. 24. Wheat BGC4(5D) orthologous gene cluster on *Aegilops tauschii* chromosome 5D. Matching orthologs are marked with grey lines.**

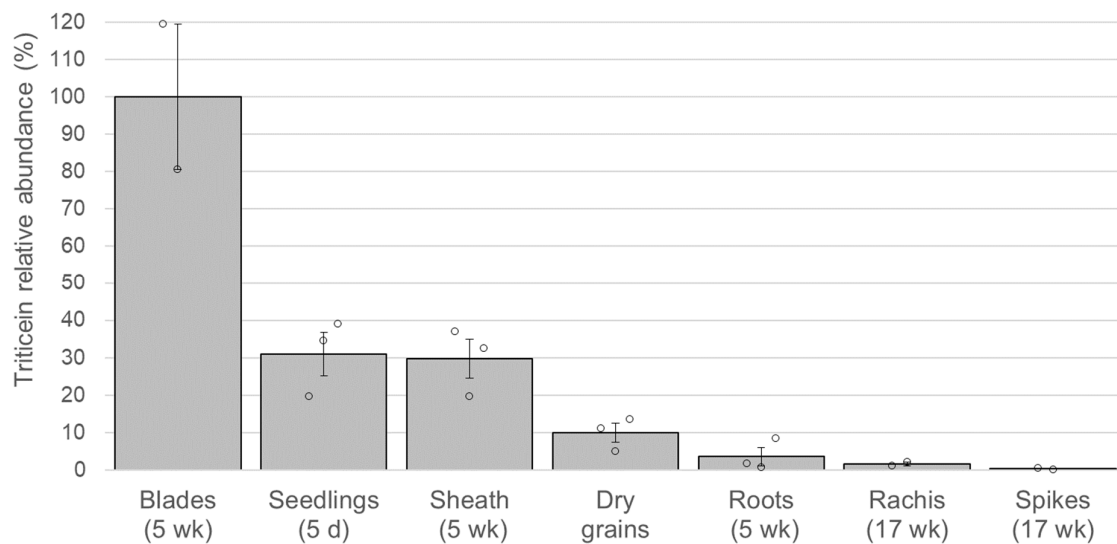

**Supplementary Fig. 25. Relative abundance of triticein in tissues from MeJA-treated ‘Chinese Spring’ plants.** Relative abundance is based on peak areas from LC-MS chromatograms, normalized by internal standard, digitoxin. All tissues, excluding dry grains, are from methyl jasmonate-treated plants. Age of plants sampled is shown in brackets. d, days; wk, weeks. n=2/n=3 (number of biological replicates). Source data are provided as a Source Data file.

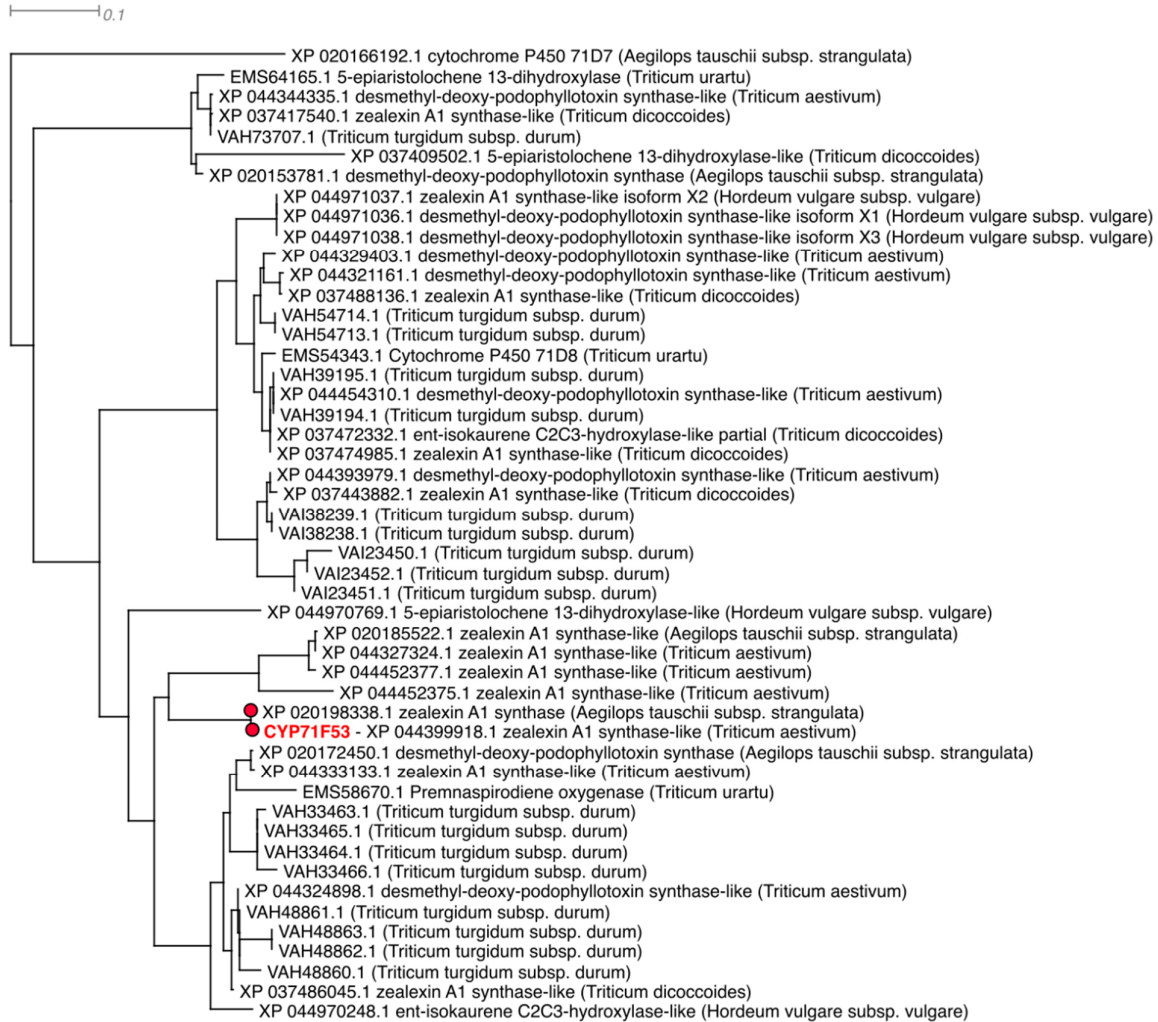

**Supplementary Fig. 26. Extracted section from maximum likelihood phylogenetic tree of CYP71 sequences from selected grass genomes.** Cytochrome P450 sequences were mined from selected grass genomes using HMMER and Pfam profile p450 (PF00067), and genomic data accessed at Ensembl Plants (<https://plants.ensembl.org/index.html>): *Aegilops tauschii* subsp. *strangulata*, *Brachypodium distachyon*, *Hordeum vulgare* subsp. *vulgare*, *Oryza sativa Indica*, *Oryza sativa japonica*, *Panicum virgatum*, *Setaria italica*, *Sorghum bicolor*, *Triticum aestivum*, *Triticum dicoccoides*, *Triticum turgidum* subsp. *durum*, *Triticum urartu*, *Zea mays*. Sequences were aligned with MAFFT<sup>11</sup>, using automatic parameters and a draft phylogeny generated with FastTree 2<sup>12</sup>, using standard parameters. The draft phylogeny was used to select putative CYP71 sequences for higher quality alignment and phylogenetic analysis. Selected CYP71 peptide sequences were next aligned with MAFFT<sup>11</sup>, using the FFT-NS-i model with a maximum of 1000 iterations. The phylogenetic tree was generated from alignments with RAxML<sup>13</sup>, using the PROTGAMMAAUTO model and 100 rapid bootstraps. *TaCYP71F53* and its ortholog in *Aegilops tauschii* are marked.

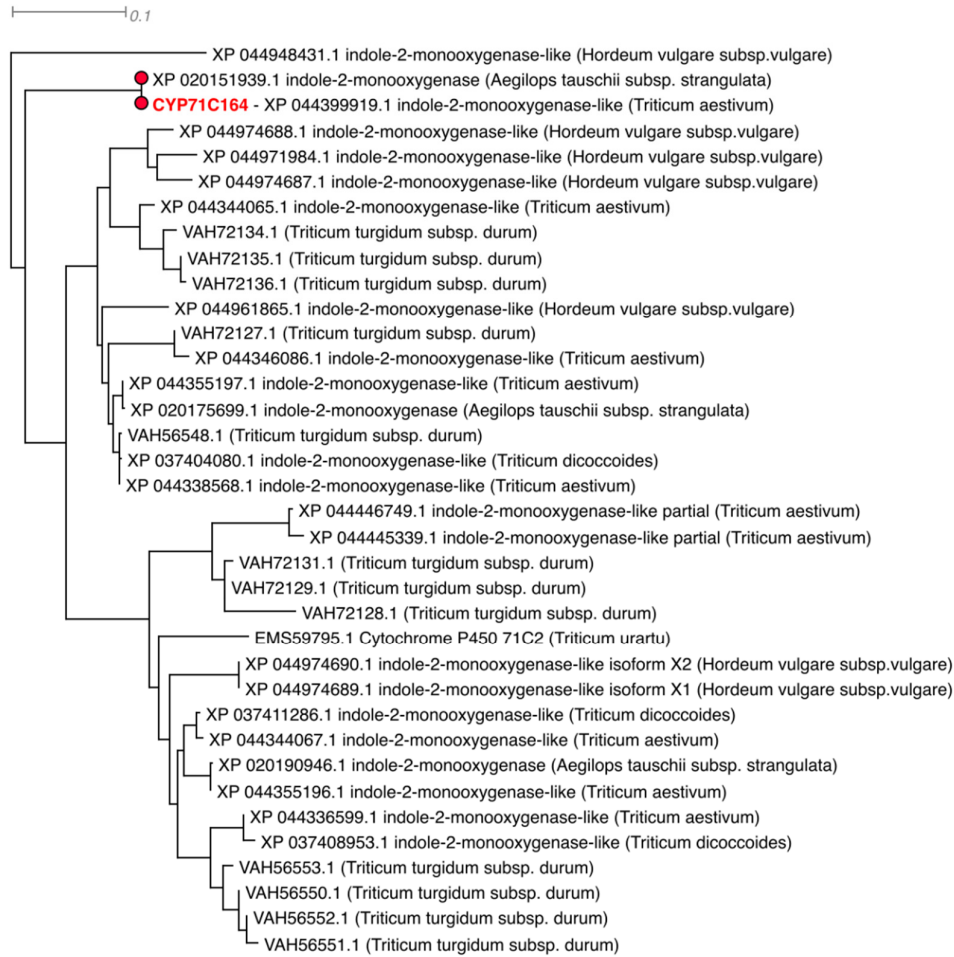

**Supplementary Fig. 27. Extracted section from maximum likelihood phylogenetic tree of CYP71 sequences from selected grass genomes. See details described in Supplementary Fig. 21. *TaCYP71C164* and its ortholog in *Aegilops tauschii* are marked.**

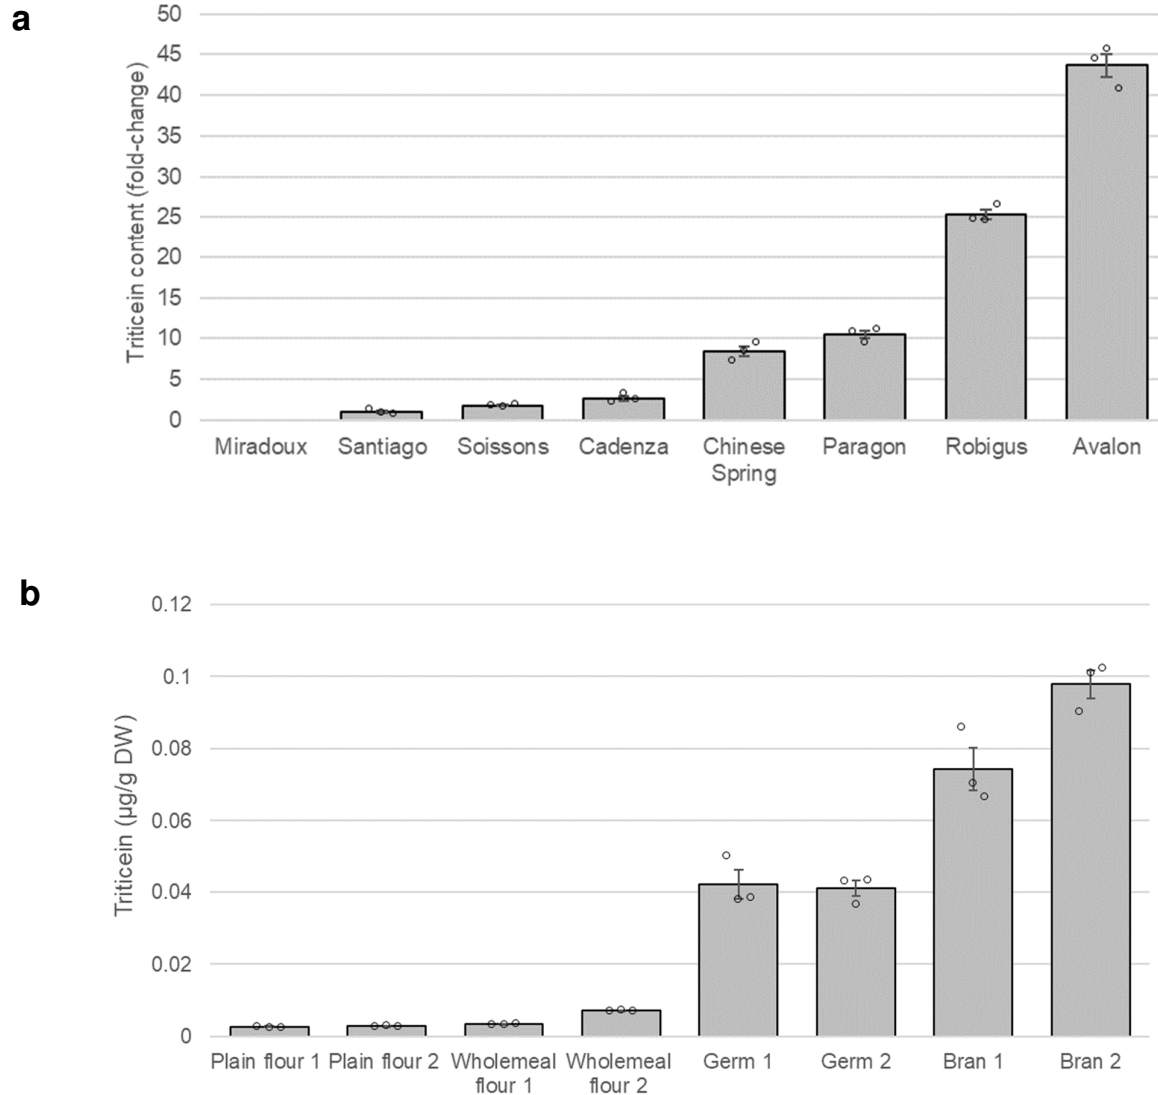

**Supplementary Fig. 28. Triticein quantification in wheat grains and flours.** **a**, relative quantification of triticein (**6**) content in grains from wheat landrace ‘Chinese Spring’, durum wheat cultivar ‘Miradoux’, and six commercial hexaploid wheat cultivars. Mean fold-change values compared to ‘Santiago’  $\pm$  SEM of three biological replicates are presented. **b**, quantification of triticein (**6**) content in commercial wheat flours. Mean values  $\pm$  SEM of three technical replicates are presented.  $n=3$  (biological replicates in panel **a**, technical replicates in panel **b**). Source data are provided as a Source Data file.



| Gene ID                   | Annotation                                         | Gene name in this study   | Genomic location                   | Strand     |
|---------------------------|----------------------------------------------------|---------------------------|------------------------------------|------------|
| <b>TraesCS5D02G487900</b> | <b>Cytochrome P450</b>                             | <b><i>TaCYP71F53</i></b>  | <b>5D: 522,758,805-522,761,728</b> | <b>rev</b> |
| TraesCS5D02G488000        | Pre-mRNA-splicing ATP-dependent RNA helicase PRP28 |                           | 5D: 522,788,154-522,788,420        | fwd        |
| TraesCS5D02G488100        | Neuroblastoma-amplified sequence protein           |                           | 5D: 523,014,862-523,015,914        | rev        |
| TraesCS5D02G488200        | 50S ribosomal protein L32, chloroplastic           |                           | 5D: 523,037,174-523,037,365        | rev        |
| <b>TraesCS5D02G488300</b> | <b>O-methyltransferase-like protein</b>            | <b><i>TaOMT6</i></b>      | <b>5D: 523,185,997-523,187,567</b> | <b>rev</b> |
| <b>TraesCS5D02G488400</b> | <b>O-methyltransferase-like protein</b>            | <b><i>TaOMT7</i></b>      | <b>5D: 523,313,281-523,314,724</b> | <b>rev</b> |
| <b>TraesCS5D02G488500</b> | <b>Cytochrome P450</b>                             | <b><i>TaCYP71C164</i></b> | <b>5D: 523,451,905-523,454,959</b> | <b>rev</b> |
| TraesCS5D02G488600        | Chalcone synthase                                  |                           | 5D: 523,938,040-523,940,039        | rev        |
| <b>TraesCS5D02G488700</b> | <b>Chalcone synthase*</b>                          | <b><i>TaCHS1</i></b>      | <b>5D: 523,991,850-523,993,876</b> | <b>rev</b> |
| <b>TraesCS5D02G488800</b> | <b>O-methyltransferase</b>                         | <b><i>TaOMT3</i></b>      | <b>5D: 524,249,356-524,251,095</b> | <b>fwd</b> |
| <b>TraesCS5D02G488900</b> | <b>O-methyltransferase</b>                         | <b><i>TaOMT8</i></b>      | <b>5D: 524,259,452-524,261,298</b> | <b>fwd</b> |
| TraesCS5D02G489000        | Chalcone-flavanone isomerase family protein        | <i>chi-D1</i>             | 5D: 524,334,560-524,335,791        | rev        |

**Table S1. Genes comprising BGC4(5D) in *Triticum aestivum* (cv. Chinese Spring).** Gene IDs (IWGSC RefSeqv1.1) and genomic locations were extracted from EnsemblPlants (<https://plants.ensembl.org/>). In bold: genes that are co-expressed (r-val>0.7) with the *TaCHS1* bait gene (asterisked).

| Compound                                                                 | Compound number | Gene expression combination                    | Elemental composition [M+H] <sup>+</sup> | Calculated mass [M+H] <sup>+</sup> | Observed mass [M+H] <sup>+</sup> | Delta [ppm] | Rt PDA (min) | λ <sub>max</sub> (nm) |
|--------------------------------------------------------------------------|-----------------|------------------------------------------------|------------------------------------------|------------------------------------|----------------------------------|-------------|--------------|-----------------------|
| <b>Naringenin</b>                                                        | <b>1</b>        | TaCHS+chi-D1                                   | C15H13O5                                 | 273.0757                           | 273.0752                         | -2.14       | 6.61         | 288                   |
| naringenin (glycoside)                                                   | 1'              |                                                | C21H23O10                                | 435.1286                           | 435.1274                         | -2.60       | 4.48         | 284                   |
| naringenin (malonyl-glycoside)                                           | 1**             |                                                | C24H25O13                                | 521.1281                           | 521.1289                         | -1.64       | 5.39         | 284                   |
| <b>naringenin 4'-methyl ether (isosakuranetin)</b>                       | <b>2</b>        | (+TaOMTS)                                      | C16H15O5                                 | 287.0914                           | 287.0914                         | -0.11       | 8.98         | 288                   |
| isosakuranetin (glycoside)                                               | 2'              |                                                | C22H25O10                                | 449.1456                           | 449.1442                         | -3.66       | 6.45         | 284                   |
| isosakuranetin (malonyl-glycoside)                                       | 2**             |                                                | C25H27O13                                | 535.1446                           | 535.1436                         | -1.99       | 7.06         | 284                   |
| <b>naringenin 4',7-dimethyl ether</b>                                    | <b>3</b>        | (+TaOMTS+TaOMT3)                               | C17H17O5                                 | 301.1070                           | 301.1062                         | -2.72       | 11.24        | 288                   |
| <b>2',5-dihydroxy-4',7-dimethoxyflavanone (artocarpانون A)</b>           | <b>4</b>        | (+TaOMTS+TaOMT3+TaCYP7IC164)                   | C17H17O6                                 | 317.1019                           | 317.1010                         | -3.10       | 9.81         | 288                   |
| Artocarpانون A (glycoside)                                               | 4'              |                                                | C23H27O11                                | 479.1547                           | 479.1537                         | -2.24       | 7.46         | 288                   |
| Artocarpانون A (diglycoside)                                             | 4''             |                                                | C29H37O16                                | 641.2076                           | 641.2058                         | -2.81       | 6.42         | 288                   |
| Artocarpانون A (malonyl-glycoside)                                       | 4**             |                                                | C26H29O14                                | 565.1551                           | 565.1539                         | -2.32       | 8.04         | 288                   |
| <b>2',5-dihydroxy-4',7-dimethoxyisoflavone (2'-O-demethyl-triticein)</b> | <b>5</b>        | (+TaOMTS+TaOMT3+TaCYP7IC164+TaCYP7IF53)        | C17H15O6                                 | 315.0863                           | 315.0855                         | -2.55       | 9.63         | 260                   |
| 2'-demethyl-triticein (glycoside)                                        | 5'              |                                                | C23H25O11                                | 477.1391                           | 477.1380                         | -2.45       | 7.05         | 260                   |
| 2'-demethyl-triticein (diglycoside)                                      | 5''             |                                                | C29H35O16                                | 639.1919                           | 639.1906                         | -2.21       | 6.11         | 260                   |
| 2'-demethyl-triticein (malonyl-glycoside)                                | 5**             |                                                | C26H27O14                                | 563.1395                           | 563.1386                         | -1.64       | 7.68         | 260                   |
| <b>5-hydroxy-2',4',7-trimethoxyisoflavone (triticein)</b>                | <b>6</b>        | (+TaOMTS+TaOMT3+TaCYP7IC164+TaCYP7IF53+TaOMT6) | C18H17O6                                 | 329.1019                           | 329.1012                         | -2.33       | 11.08        | 260                   |
| triticein (glycoside)                                                    | 6'              |                                                | C24H27O11                                | 491.1547                           | 491.1537                         | -2.30       | 6.83         | 260                   |
| triticein (diglycoside)                                                  | 6''             |                                                | C30H37O16                                | 653.2076                           | 653.2062                         | -2.10       | 5.91         | 260                   |
| <b>naringenin trimethyl ether</b>                                        | <b>7</b>        | (+TaOMTS+TaOMT3+TaOMT6)                        | C18H19O5                                 | 315.1227                           | 315.1221                         | -2.00       | 9.00         | 284                   |
| <b>3,5-dihydroxy-4',7-dimethoxyflavanone</b>                             | <b>8</b>        | (+TaOMTS+TaOMT3+TaCYP7IF53)                    | C17H17O6                                 | 317.1019                           | 317.1012                         | -2.33       | 9.06         | 292                   |
| 3,5-dihydroxy-4',7-dimethoxyflavanone (glycoside)                        | 8'              |                                                | C23H27O11                                | 479.1547                           | 479.1535                         | -2.62       | 5.92         | 284                   |
| 3,5-dihydroxy-4',7-dimethoxyflavanone (diglycoside)                      | 8''             |                                                | C29H37O16                                | 641.2076                           | 641.2062                         | -2.24       | 4.99         | 284                   |
| 3,5-dihydroxy-4',7-dimethoxyflavanone (methylated)                       | 8^              |                                                | C18H19O6                                 | 331.1176                           | 331.1164                         | -3.78       | 8.05         | 288                   |
| <b>2',4',5,7-tetramethoxyflavanone</b>                                   | <b>9</b>        | (+TaOMTS+TaOMT3+TaCYP7IC164+TaOMT6)            | C19H21O6                                 | 345.1332                           | 345.1324                         | -2.46       | 9.34         | 284                   |

**Table S2. Compounds identified in this study.** Rt PDA, retention time on photo diode array chromatogram. NMR spectra for compounds (4), (5), (6), (8) are provided in Supplementary Data 1.



---

### Full CDS (Gateway) cloning

|               |                                                                 |
|---------------|-----------------------------------------------------------------|
| TaCHS1 F      | GGGGACAAGTTTGTACAAAAAAGCAGGCTATGGCCGCCGCTGTTACCGTAGACGAAG       |
| TaCHS1 R      | GGGGACCACCTTTGTACAAGAAAGCTGGGTTCAGCGGCTGTTGCCTCACACTG           |
| chi-D1 F      | GGGGACAAGTTTGTACAAAAAAGCAGGCTATGGCAGTTCCGAAC TAGAAGTTG          |
| chi-D1 R      | GGGGACCACCTTTGTACAAGAAAGCTGGGTTCATACTGAGACACTGACTGCTTCA         |
| TaOMT8 F      | GGGGACAAGTTTGTACAAAAAAGCAGGCTATGGGTTCTATCTCCGACGACGAGGCG        |
| TaOMT8 R      | GGGGACCACCTTTGTACAAGAAAGCTGGGTCTATTTGTTCAACTCAATGACCCATATG      |
| TaOMT3 F      | GGGGACAAGTTTGTACAAAAAAGCAGGCTATGGGCTCCACTGCCGTGGAGAAGGTC        |
| TaOMT3 R      | GGGGACCACCTTTGTACAAGAAAGCTGGGTCTATTTGACGAACTCAATGACCCATGC       |
| TaOMT6 F      | GGGGACAAGTTTGTACAAAAAAGCAGGCTATGGAAGATCTCGTGAAGAAACC            |
| TaOMT6 R      | GGGGACCACCTTTGTACAAGAAAGCTGGGTTC AAGGGTAGAGCTCAATAACAGATCTAACTC |
| TaOMT7 F      | GGGGACAAGTTTGTACAAAAAAGCAGGCTATGGCGCCACCCAAGGCAAGCAGAGTTCTCAGGA |
| TaOMT7 R      | GGGGACCACCTTTGTACAAGAAAGCTGGGTTC AAGGGTAGAGCTCAATAACAGATCTAAAC  |
| TaCYP71C164 F | GGGGACAAGTTTGTACAAAAAAGCAGGCTATGGAAGATCTCGTGAAGAAACC            |
| TaCYP71C164 R | GGGGACCACCTTTGTACAAGAAAGCTGGGTCTACATCCAGGATTTTGG AATTAACAATAG   |
| TaCYP71F53 F  | GGGGACAAGTTTGTACAAAAAAGCAGGCTATGGAGGGTTGGTTAACCTTATGTTTC        |
| TaCYP71F53 R  | GGGGACCACCTTTGTACAAGAAAGCTGGGTCTATATAGTGGAGCGTACATATGGAATAGC    |
| AtMYB12 F     | GGGGACAAGTTTGTACAAAAAAGCAGGCTATGGGAAGAGCGCCATGTTGCGAG           |
| AtMYB12 R     | GGGGACCACCTTTGTACAAGAAAGCTGGGTTCATGACAGAAGCCAAGCGACCAAAGC       |

---

### *T. aestivum* qRT-PCR

|               |                         |
|---------------|-------------------------|
| TaCHS1 F      | ACTGTTCCAACCTGTCTCGG    |
| TaCHS1 R      | CACCTTCCACCTCCACAAG     |
| chi-D1 F      | GGTGTGAACGAACCGGG       |
| chi-D1 R      | GAAATGGAGGGAACACGACG    |
| TaOMT8 F      | TCAACTTCGACCTCCCTCAC    |
| TaOMT8 R      | TGCAATGCTCATCGTTCCAG    |
| TaOMT3 F      | AGTACAACAGCACAGACCCA    |
| TaOMT3 R      | GTCGAAGCCCCTGTAGAACT    |
| TaOMT6 F      | AGATGCTGGTGGAAAGGTGA    |
| TaOMT6 R      | CCCCCAGCACCCCATGATAA    |
| TaCYP71C164 F | GGGTTCAACGTGGAGGAGTA    |
| TaCYP71C164 R | CCTTGCTCACATGATCGTCG    |
| TaCYP71F53 F  | CCAATGACATCGCCTTCTCG    |
| TaCYP71F53 R  | GCTCCATGATGCAGACCTTG    |
| TUBB F        | CAAGGAGGTGGACGAGCAGATG  |
| TUBB R        | GACTTGACGTTGTTGGGGATCCA |

---

### KASP genotyping

|                            |                                                |
|----------------------------|------------------------------------------------|
| Cad0227 (5D:522761619 C/T) |                                                |
| FAM:                       | GAAGGTGACCAAGTTCATGCTAGCTGCGGTCATGGAGGGTTGg    |
| HEX/VIC:                   | GAAGGTCGGAGTCAACGGATTAGCTGCGGTCATGGAGGGTTGa    |
| common:                    | TTGCTCTTGCCACCGGAAAA                           |
| Cad1793 (5D:522759509 G/A) |                                                |
| FAM:                       | GAAGGTGACCAAGTTCATGCTGATCGCTATTGCCAATGATAGCTCg |
| HEX/VIC:                   | GAAGGTCGGAGTCAACGGATTGATCGCTATTGCCAATGATAGCTCa |
| common:                    | GGTTCGAGAGGTACTGGGTCAT                         |
| Cad1682 (5D:524249622 C/T) |                                                |
| FAM:                       | GAAGGTGACCAAGTTCATGCTTGGCCTTCGACGGAAGCTg       |
| HEX/VIC:                   | GAAGGTCGGAGTCAACGGATTGTCGCTTGGCCTTCGACGGAAGCTa |
| common:                    | AATGACCCTCAAGAACGCCATC                         |
| Cad1684 (5D:524260382 G/A) |                                                |
| FAM:                       | GAAGGTGACCAAGTTCATGCTGTCCGGTAAATGTTTTAAAGg     |
| HEX/VIC:                   | GAAGGTCGGAGTCAACGGATTGTCGCTAAATGTTTTAAAGa      |
| common:                    | GTAATCAAACGCTGTCATTC                           |

---

**Table S3. Oligos used in this study.**

## REFERENCES

- 1 Ma, S. *et al.* WheatOmics: A platform combining multiple omics data to accelerate functional genomics studies in wheat. *Mol Plant* **14**, 1965-1968 (2021).  
<https://doi.org/10.1016/j.molp.2021.10.006>
- 2 Palma-Guerrero, J. *et al.* Comparative transcriptomic analyses of *Zymoseptoria tritici* strains show complex lifestyle transitions and intraspecific variability in transcription profiles. *Mol Plant Pathol* **17**, 845-859 (2016). <https://doi.org/10.1111/mpp.12333>
- 3 Zhang, H. *et al.* Large-scale transcriptome comparison reveals distinct gene activations in wheat responding to stripe rust and powdery mildew. *BMC Genomics* **15**, 898 (2014).  
<https://doi.org/10.1186/1471-2164-15-898>
- 4 Hofstad, A. N. *et al.* Examining the Transcriptional Response in Wheat Fhb1 Near-Isogenic Lines to *Fusarium graminearum* Infection and Deoxynivalenol Treatment. *Plant Genome* **9** (2016). <https://doi.org/10.3835/plantgenome2015.05.0032>
- 5 Ramirez-Gonzalez, R. H. *et al.* The transcriptional landscape of polyploid wheat. *Science* **361**, 662+ (2018). <https://doi.org/10.1126/science.aar6089>
- 6 Garcia-Seco, D. *et al.* Transcriptome and proteome analysis reveal new insight into proximal and distal responses of wheat to foliar infection by *Xanthomonas translucens*. *Sci Rep* **7**, 10157 (2017). <https://doi.org/10.1038/s41598-017-10568-8>
- 7 Winter, D. *et al.* An "Electronic Fluorescent Pictograph" browser for exploring and analyzing large-scale biological data sets. *PLoS One* **2**, e718 (2007).  
<https://doi.org/10.1371/journal.pone.0000718>
- 8 Polturak, G. *et al.* Pathogen-induced biosynthetic pathways encode defense-related molecules in bread wheat. *Proc Natl Acad Sci U S A* **119**, e2123299119 (2022).  
<https://doi.org/10.1073/pnas.2123299119>
- 9 Kumar, S., Stecher, G. & Tamura, K. MEGA7: Molecular Evolutionary Genetics Analysis Version 7.0 for Bigger Datasets. *Molecular Biology and Evolution* **33**, 1870-1874 (2016).  
<https://doi.org/10.1093/molbev/msw054>
- 10 Arora, S. *et al.* A wheat kinase and immune receptor form host-specificity barriers against the blast fungus. *Nat Plants* **9**, 385-392 (2023). <https://doi.org/10.1038/s41477-023-01357-5>

- 11 Katoh, K., Misawa, K., Kuma, K. & Miyata, T. MAFFT: a novel method for rapid multiple sequence alignment based on fast Fourier transform. *Nucleic Acids Res* **30**, 3059-3066 (2002).  
<https://doi.org/10.1093/nar/gkf436>
- 12 Price, M. N., Dehal, P. S. & Arkin, A. P. FastTree 2--approximately maximum-likelihood trees for large alignments. *PLoS One* **5**, e9490 (2010).  
<https://doi.org/10.1371/journal.pone.0009490>
- 13 Stamatakis, A. RAxML version 8: a tool for phylogenetic analysis and post-analysis of large phylogenies. *Bioinformatics* **30**, 1312-1313 (2014).  
<https://doi.org/10.1093/bioinformatics/btu033>
